# Supplementary material for: Entrepreneurship Resilience: Can Psychological Traits of Entrepreneurial Intention Support Overcoming Entrepreneurial Failure?
Source: Front Psychol. 2021 Sep 14;12:707803. doi: 10.3389/fpsyg.2021.707803 (PMC8476748; doi:10.3389/fpsyg.2021.707803)
Supplement: Supplementary file 1 [file Data_Sheet_1.ZIP]

Archive with 6 entries (6 files):
- Resiliance and Failure of Entreprenuership/.meta
- Resiliance and Failure of Entreprenuership/210208.xlsx.txt
- Resiliance and Failure of Entreprenuership/210208.xlsx.txt.aggregated
- Resiliance and Failure of Entreprenuership/210208.xlsx.txt.meta
- Resiliance and Failure of Entreprenuership/Resiliance and Failure of Entreprenuership.splsm
- Resiliance and Failure of Entreprenuership/Resiliance and Failure of Entreprenuership.splsm.meta
