# Supplementary material for: Entrepreneurship Resilience: Can Psychological Traits of Entrepreneurial Intention Support Overcoming Entrepreneurial Failure?
Source: Front Psychol. 2021 Sep 14;12:707803. doi: 10.3389/fpsyg.2021.707803 (PMC8476748; doi:10.3389/fpsyg.2021.707803)
Supplement: Supplementary file 1 [file Data_Sheet_1.ZIP › Resiliance and Failure of Entreprenuership/210208.xlsx.txt]

ESE1	ESE2	ESE3	ESE4	ESE5	ILC1	ILC2	ILC3	ILC4	ILC5	PLF1	PLF2	PLF3	PLF4	PLF5	REC1	REC2	REC3	REC4	REC5	CEE1	CEE2	CEE3	CEE4	CEE5	NOR1	NOR2	NOR3	NOR4	NOR5
7	7	6	6	6	6	6	5	5	5	5	6	5	5	6	6	5	5	5	6	5	5	6	6	5	5	6	5	6	5
6	6	6	7	6	6	6	5	6	6	6	6	7	5	6	5	6	7	6	6	7	6	7	6	5	5	6	6	6	5
5	5	6	6	6	7	7	6	7	7	6	6	6	6	6	6	5	6	6	6	7	6	7	7	6	6	5	6	6	6
4	6	6	6	6	5	6	5	5	6	6	7	7	5	4	4	4	4	4	3	3	5	5	4	4	4	4	5	5	4
6	6	5	7	7	5	5	5	5	6	5	6	6	5	5	6	4	5	5	2	3	5	5	4	2	4	6	5	6	6
7	7	7	7	7	7	7	5	5	5	4	6	7	7	4	6	4	6	5	6	7	7	7	6	6	7	6	5	5	5
6	6	5	7	7	6	6	5	5	5	4	4	4	4	4	4	4	4	4	2	4	6	6	6	4	5	6	5	4	6
6	6	6	6	6	6	6	6	6	6	6	6	6	6	4	6	4	6	6	4	6	6	6	6	4	4	6	6	6	6
6	6	4	5	6	6	6	5	5	6	4	6	6	6	5	6	6	6	5	4	5	6	6	5	3	3	5	5	5	5
6	6	6	6	6	6	6	6	6	6	6	6	6	6	5	5	6	6	5	2	2	2	2	2	2	2	7	7	7	7
4	4	4	6	6	5	4	4	4	5	5	5	5	4	5	4	4	5	4	2	5	5	6	3	1	1	4	3	4	2
4	4	4	4	4	7	5	4	7	7	7	4	4	7	5	7	4	7	7	6	6	7	6	6	6	7	5	5	5	5
5	5	5	5	6	6	5	5	5	5	5	5	5	5	5	5	5	6	5	3	5	4	5	4	4	4	5	5	5	5
4	4	4	6	6	6	6	5	5	6	6	7	7	5	6	6	6	6	6	5	5	6	6	5	4	5	6	5	4	5
6	6	7	7	6	6	6	6	6	7	7	7	7	7	6	5	6	7	6	6	7	6	7	7	5	7	6	6	6	5
7	7	6	7	6	6	5	5	5	6	6	6	6	5	3	3	3	4	3	1	6	6	6	5	4	4	3	4	4	4
7	7	6	6	5	6	6	6	6	6	6	6	7	6	6	6	6	6	6	6	7	7	7	6	6	7	7	7	7	7
6	5	7	4	6	6	6	5	4	5	4	6	5	6	6	5	4	5	4	5	6	6	6	6	4	6	5	4	5	6
6	6	7	6	7	6	5	6	5	5	5	6	7	5	4	5	4	6	5	6	7	7	6	3	4	3	6	6	6	7
6	7	7	7	7	7	6	6	6	7	6	6	6	6	6	6	6	6	6	7	7	6	6	6	5	5	6	6	7	6
6	6	6	7	7	5	4	5	4	6	6	6	6	6	4	4	4	5	4	2	5	5	5	5	3	4	4	5	5	5
1	1	1	1	1	1	1	1	1	1	2	2	2	2	4	4	4	4	4	6	6	6	6	7	6	7	7	7	7	7
6	7	7	6	7	7	6	6	7	7	6	7	7	6	6	6	6	6	6	4	6	4	6	4	4	6	6	6	6	6
6	4	6	6	6	6	2	4	2	4	5	6	4	4	5	4	4	6	4	6	6	6	6	6	6	6	7	7	7	7
5	5	6	6	7	6	6	5	5	5	5	5	6	5	4	5	5	5	5	4	5	6	6	6	5	6	5	4	5	5
7	7	7	4	7	7	7	5	5	6	6	6	6	6	3	4	4	4	4	3	6	6	6	6	5	5	6	5	5	5
6	6	6	7	7	6	6	5	6	6	6	6	6	6	4	4	4	5	4	6	6	6	6	6	6	5	6	6	5	5
3	3	3	3	3	3	3	2	3	3	2	2	3	2	3	3	2	3	3	1	3	3	3	3	1	3	6	7	6	5
3	5	6	6	5	4	4	6	4	3	3	4	4	4	4	4	4	5	5	4	5	5	6	6	4	5	5	4	3	3
4	5	4	5	4	5	4	3	4	4	3	4	4	4	3	4	4	3	3	4	5	4	4	3	3	3	4	4	4	4
4	4	4	4	4	4	4	4	4	4	4	4	4	4	3	3	3	3	3	3	4	4	4	4	3	3	7	7	7	7
1	1	1	3	1	3	3	3	1	3	3	3	3	1	1	3	3	3	3	3	3	3	3	3	3	3	4	3	4	3
6	6	6	6	6	4	4	5	5	6	6	6	6	6	4	4	4	5	5	3	6	6	6	6	4	4	4	4	4	4
7	6	7	7	7	6	6	6	5	7	7	6	6	4	4	4	4	6	4	2	6	7	7	6	1	4	7	5	5	5
6	6	7	3	6	6	6	4	6	6	6	7	7	4	4	5	4	5	5	2	6	6	6	6	5	5	3	3	3	3
7	7	7	7	7	7	6	6	7	7	6	7	7	5	4	6	6	6	4	2	2	2	7	6	3	4	7	7	7	7
4	4	4	6	7	6	4	4	4	4	4	5	4	4	4	4	4	4	4	3	4	6	6	6	4	4	5	5	5	5
5	5	5	6	7	6	6	4	7	3	3	3	2	2	2	4	4	5	3	5	4	5	3	7	5	4	4	2	3	5
3	3	1	1	1	3	3	3	3	1	1	3	3	3	3	6	3	6	3	4	5	5	6	6	6	5	2	2	2	1
6	6	7	7	6	6	6	6	6	7	6	7	7	6	6	5	5	6	6	4	5	6	5	6	5	6	5	6	6	5
5	6	7	7	7	6	6	6	6	6	5	6	6	4	6	6	4	5	4	5	5	5	5	2	2	2	5	5	5	6
6	6	6	6	6	6	6	5	5	6	5	6	6	6	3	3	3	4	3	2	6	6	7	5	5	5	4	4	4	4
6	6	6	6	6	6	6	6	6	6	5	6	6	5	4	4	4	4	4	3	5	5	5	5	3	3	6	6	6	6
6	6	6	6	6	6	6	6	6	6	6	6	6	6	6	6	5	6	6	2	6	6	6	6	2	2	7	6	5	6
6	6	6	6	6	6	6	6	6	6	6	6	6	6	6	6	6	6	6	5	6	6	6	6	5	5	5	5	5	4
5	6	5	6	6	5	5	5	5	5	6	6	6	5	5	4	3	4	4	4	5	4	5	4	4	4	6	6	6	6
6	6	6	6	6	6	6	6	6	6	6	6	6	6	5	6	6	6	6	4	5	6	6	6	5	5	6	6	6	6
4	4	5	5	5	5	5	4	4	4	4	4	5	4	4	4	4	5	4	2	5	5	5	3	3	3	5	5	5	5
4	5	6	6	6	5	5	4	4	6	6	6	7	7	4	5	5	5	4	4	6	6	4	5	5	6	4	4	4	2
7	7	7	7	7	7	7	7	7	7	7	7	7	7	6	6	6	6	7	4	4	6	7	6	6	4	6	7	7	5
5	5	6	6	6	5	5	5	4	4	4	5	4	5	4	4	4	4	5	5	6	5	5	5	5	6	5	5	5	5
6	7	6	6	6	4	4	5	4	5	5	4	6	4	5	5	5	6	5	5	6	6	6	6	5	5	6	6	6	6
6	6	6	6	6	5	5	3	5	5	3	5	5	6	5	4	4	5	5	4	6	4	6	6	6	6	5	5	5	6
7	7	7	7	6	6	6	6	5	6	6	7	7	6	3	3	3	3	3	2	2	6	3	3	2	2	5	5	5	4
6	6	3	6	6	6	6	3	3	6	6	6	6	6	6	6	3	5	5	6	6	6	6	6	6	6	6	6	6	6
7	7	7	7	7	7	7	7	7	7	7	7	7	7	3	3	3	3	3	2	2	2	2	2	2	2	7	7	7	7
3	5	5	5	5	4	4	5	4	5	4	5	5	4	4	4	4	4	4	3	3	3	5	5	3	3	3	3	3	3
6	6	6	6	6	6	6	6	6	6	6	6	6	5	4	5	4	5	5	4	4	4	5	4	3	4	7	6	6	7
6	5	6	5	6	6	7	5	7	7	6	7	7	7	4	4	4	4	4	2	2	6	7	3	2	2	5	6	6	6
3	1	1	1	2	1	3	3	1	1	3	1	3	3	1	1	1	1	1	3	6	6	6	6	4	5	5	5	4	6
6	6	6	7	7	6	6	6	6	6	6	6	6	6	6	6	4	6	6	3	6	6	6	6	5	6	5	4	5	6
7	7	7	7	7	7	7	6	6	6	6	7	7	7	5	5	5	6	6	4	6	6	6	6	4	5	6	6	6	5
6	6	6	5	5	7	5	5	5	4	3	3	3	3	4	4	4	4	3	2	2	2	5	2	2	2	4	4	4	4
6	6	6	6	6	6	6	6	6	6	6	6	6	6	5	5	5	6	6	5	6	6	6	6	6	6	6	5	6	6
6	6	6	6	6	6	6	5	6	6	6	6	6	6	5	4	4	5	4	5	5	6	6	6	5	5	4	4	4	4
6	6	6	5	7	5	5	5	5	5	6	6	7	6	6	4	4	6	6	4	6	6	6	6	5	6	4	5	5	4
6	6	6	6	6	6	6	6	6	6	5	6	6	6	5	5	5	5	5	5	6	6	6	6	4	4	5	5	5	5
7	7	7	7	7	7	7	7	7	7	5	7	7	6	6	6	4	6	6	1	5	6	7	5	5	5	7	7	7	7
6	6	6	7	6	6	6	5	5	6	5	6	6	6	5	5	5	5	4	3	6	6	5	4	4	4	7	7	7	7
6	6	6	6	6	6	6	5	6	5	5	5	5	5	5	5	5	5	5	3	6	6	6	6	5	5	6	6	6	6
3	3	1	3	2	3	3	3	2	2	2	3	2	3	2	2	2	2	1	3	3	2	3	3	3	3	4	4	4	5
3	4	5	6	7	6	5	4	3	2	1	2	3	4	2	3	4	3	4	1	2	2	3	3	3	4	4	3	5	4
3	4	5	6	7	6	5	4	3	2	1	2	3	4	2	3	4	3	4	1	2	2	3	3	3	4	4	3	5	4
6	5	7	6	6	6	5	5	3	5	5	6	7	6	5	5	3	5	5	2	3	3	6	5	4	5	5	5	5	5
7	7	6	7	7	6	7	6	6	6	6	6	7	6	5	6	5	6	6	2	3	3	6	5	5	4	6	6	7	7
6	7	6	7	7	7	6	6	6	7	7	7	6	7	6	6	6	6	6	6	7	7	7	7	6	6	6	6	6	6
6	7	7	7	7	6	7	7	7	7	7	7	7	7	5	7	3	7	7	3	6	7	7	7	3	7	7	7	7	7
3	3	5	4	4	5	5	5	5	4	4	5	4	4	6	6	6	6	6	4	4	4	4	5	4	5	5	7	5	5
6	6	6	6	6	6	6	6	6	6	6	6	6	6	5	4	4	6	4	1	4	4	4	6	2	4	6	6	6	6
6	6	6	5	6	6	5	3	5	5	5	5	5	3	5	5	5	5	5	6	5	5	6	6	6	6	3	3	3	4
6	6	6	6	6	6	6	6	6	6	6	6	6	6	6	6	5	6	6	2	2	2	2	2	2	2	7	7	7	7
7	7	7	7	7	7	7	7	7	7	7	7	7	7	6	4	6	6	5	7	7	7	7	7	7	6	7	6	7	7
6	7	6	7	6	6	6	6	6	6	6	6	7	6	4	6	4	6	6	6	6	6	6	7	6	6	6	6	6	6
4	4	4	4	4	4	4	3	3	3	4	4	4	2	4	3	3	5	4	5	6	6	6	5	4	4	5	6	6	6
7	7	7	7	6	7	7	7	7	7	6	7	7	7	7	7	7	7	7	6	7	6	6	7	4	4	7	6	6	6
4	5	6	7	6	4	4	5	4	5	5	6	6	4	5	6	4	5	5	2	5	4	6	6	4	4	5	5	5	5
1	1	1	1	1	1	1	1	1	1	1	1	1	1	1	1	1	1	1	3	3	1	1	3	3	1	7	7	7	7
7	7	7	7	7	6	6	5	5	7	7	7	7	7	5	5	5	6	5	4	5	6	7	7	7	7	6	6	7	6
7	6	6	7	7	6	6	7	5	6	6	6	7	5	4	4	4	5	5	2	5	6	6	6	5	6	7	6	5	5
3	3	3	3	3	3	2	3	2	2	2	3	3	2	2	3	3	2	2	3	3	3	3	3	3	3	4	4	5	5
6	6	6	6	6	6	6	5	5	4	4	6	6	4	4	4	4	4	4	4	5	5	5	6	4	4	5	5	5	5
4	4	6	7	7	7	4	6	6	6	6	7	6	7	6	6	7	6	6	6	7	6	6	6	6	6	6	6	6	5
6	6	6	5	6	6	4	5	5	7	6	6	7	4	5	5	4	5	4	5	5	6	6	5	5	5	5	5	5	5
1	1	1	1	1	1	1	1	1	1	1	1	1	1	4	1	1	1	4	4	1	1	1	1	3	1	4	4	4	4
6	5	5	6	6	4	4	4	4	4	4	5	5	4	4	4	4	4	4	3	4	6	4	6	4	4	6	5	5	5
6	6	6	6	6	6	6	6	6	6	6	6	6	6	6	6	6	6	6	2	6	6	6	6	2	6	6	6	6	6
5	6	6	5	5	6	6	5	5	6	6	5	5	6	5	6	6	5	5	5	6	6	5	5	6	6	5	6	6	5
4	4	4	4	4	4	4	4	4	4	4	4	4	4	3	3	3	4	3	4	4	4	4	4	4	4	4	4	4	4
1	1	1	1	1	1	1	1	1	1	3	1	1	1	1	1	3	1	1	2	1	1	1	1	2	2	6	7	6	4
6	6	6	6	6	6	6	6	6	6	6	6	6	6	6	6	6	6	6	5	6	6	6	5	5	6	6	5	5	5
6	6	6	6	5	6	6	7	6	7	7	7	7	5	6	6	5	6	6	5	6	7	7	7	6	6	6	6	6	7
7	7	7	7	7	6	6	5	6	6	5	6	6	6	6	6	5	6	6	5	7	6	6	6	5	6	6	6	6	5
4	4	4	3	4	5	5	4	5	4	4	4	4	3	5	5	4	5	4	4	5	5	5	4	4	5	4	4	4	4
6	7	7	7	7	6	6	7	6	7	7	7	7	6	5	5	4	5	6	6	6	6	6	6	6	6	6	6	6	5
5	6	7	7	5	6	4	6	3	7	4	7	6	4	4	5	3	6	7	4	7	6	5	3	4	5	5	6	6	6
7	7	6	6	7	5	6	6	6	6	6	6	7	6	6	6	4	6	6	4	5	5	5	6	5	5	6	6	6	6
6	6	7	7	7	6	5	6	4	6	7	7	7	4	4	6	4	5	5	3	5	4	6	6	2	3	5	4	5	5
6	6	6	7	6	7	6	6	6	6	6	6	6	6	5	6	6	6	5	4	6	6	6	6	6	6	5	5	3	5
6	5	7	6	7	6	6	6	5	6	4	5	5	6	4	5	5	5	5	2	2	6	5	7	5	4	7	6	6	6
1	1	1	1	1	1	1	2	2	2	2	2	1	2	3	3	3	3	3	4	4	4	4	4	3	4	4	4	4	4
7	6	7	6	7	6	6	6	6	7	7	7	7	7	3	3	2	4	5	3	4	4	6	7	5	5	7	6	7	7
6	7	7	6	7	6	6	6	6	6	6	6	7	7	5	6	6	6	4	2	6	6	7	6	4	5	6	6	6	6
1	1	1	1	1	1	1	1	1	2	1	2	2	2	1	1	2	1	1	2	1	1	1	2	3	1	6	6	5	5
6	6	6	6	6	6	6	6	6	6	6	6	6	6	5	6	4	6	3	6	5	6	6	5	5	5	3	3	3	3
6	6	7	7	6	5	5	5	6	6	6	7	7	6	6	6	5	5	5	2	6	6	7	5	3	6	6	4	4	5
6	6	6	5	7	6	6	5	4	5	5	5	6	4	5	6	3	6	5	4	5	5	6	5	4	3	6	6	6	6
2	4	5	3	6	5	5	4	7	6	4	6	5	7	6	5	5	4	4	6	6	6	6	5	4	6	4	4	4	5
6	6	6	6	6	6	6	6	6	6	6	6	6	6	6	6	6	6	6	5	6	6	6	6	5	5	4	4	4	4
7	7	7	7	7	7	7	7	7	7	7	7	7	7	5	5	5	5	5	6	6	6	6	6	6	6	7	6	6	5
5	4	4	5	5	6	6	3	6	6	4	4	4	1	5	5	4	5	4	2	5	4	6	4	3	4	3	4	3	5
7	7	7	7	7	6	6	6	7	7	6	7	7	7	5	5	5	5	4	5	6	5	6	5	4	4	6	5	6	7
6	5	7	6	7	6	6	5	5	6	6	7	7	6	4	5	5	6	5	6	7	7	7	5	5	6	6	6	6	6
4	4	4	4	4	4	4	4	4	4	4	4	4	4	5	4	4	5	5	5	5	5	5	5	5	5	6	6	6	6
7	7	6	6	7	7	7	7	7	7	7	7	6	6	6	6	6	6	6	6	6	7	6	6	6	7	7	6	7	6
6	6	6	6	6	6	6	3	6	5	5	6	6	6	4	4	4	4	4	4	5	5	5	6	6	6	5	6	6	4
5	7	6	7	5	5	5	4	4	5	4	6	6	4	4	4	4	4	4	4	6	6	6	7	4	5	7	6	7	7
7	7	7	7	7	6	6	6	6	6	6	7	7	6	5	6	5	6	6	2	6	6	6	6	5	6	6	6	6	6
1	1	1	1	1	1	1	1	1	1	1	1	1	1	3	1	1	1	3	2	2	2	1	1	2	3	7	7	7	7
7	7	7	7	7	7	7	7	7	7	6	7	7	7	4	4	4	5	5	4	6	6	7	7	6	6	7	7	7	7
7	7	7	7	7	7	7	7	7	7	7	7	7	7	4	4	3	5	3	5	6	4	7	4	4	4	7	7	7	7
6	6	7	7	7	5	5	5	5	7	7	6	7	4	4	5	2	5	5	6	6	5	6	5	3	5	4	4	4	2
6	6	5	6	6	6	5	5	6	5	5	6	6	5	5	6	5	6	5	5	5	6	6	6	5	5	3	3	3	3
4	4	6	6	7	6	4	4	4	6	5	5	6	4	3	3	3	3	3	4	6	4	7	5	4	6	4	4	4	1
5	4	3	3	6	5	3	5	4	4	5	6	5	5	3	3	4	5	3	4	5	6	6	6	4	5	4	4	4	3
7	7	7	7	6	6	6	6	6	6	6	7	7	7	5	5	3	6	5	6	7	6	7	6	6	6	6	6	6	6
6	6	6	3	6	6	6	4	6	6	6	6	6	6	6	6	4	6	6	6	4	6	6	6	4	4	5	5	5	5
6	6	6	6	6	5	4	2	3	3	3	3	5	3	3	3	3	4	4	2	2	3	4	4	2	4	6	6	6	6
2	2	2	2	2	6	5	5	6	6	6	2	7	6	4	5	1	4	4	5	6	6	7	7	5	7	5	4	4	3
6	6	6	6	6	7	7	6	6	6	6	6	6	6	4	4	5	5	5	3	5	5	6	6	6	6	6	6	6	6
7	6	5	7	5	5	6	6	6	6	7	7	7	6	5	6	4	6	4	6	7	6	7	7	3	3	5	6	5	4
6	6	6	6	6	6	6	7	7	7	7	6	6	6	6	6	4	6	6	4	5	5	6	6	4	4	5	5	4	6
7	7	6	6	5	5	5	4	4	4	4	5	5	6	3	4	4	5	3	5	5	6	3	4	3	5	4	3	3	3
5	4	4	4	5	5	4	4	4	5	5	4	4	4	4	5	4	5	4	2	2	2	5	4	3	3	4	4	4	4
6	6	6	6	6	6	6	6	6	6	5	6	6	6	6	6	6	6	5	4	6	6	6	6	5	6	5	4	5	5
6	6	6	6	6	6	6	6	5	5	5	6	6	6	5	4	4	4	6	3	6	4	6	6	6	6	6	6	6	6
3	4	5	5	4	4	3	3	5	5	3	5	6	4	3	4	5	4	4	4	6	5	6	5	3	3	3	3	3	3
