# Supplementary material for: Entrepreneurship Resilience: Can Psychological Traits of Entrepreneurial Intention Support Overcoming Entrepreneurial Failure?
Source: Front Psychol. 2021 Sep 14;12:707803. doi: 10.3389/fpsyg.2021.707803 (PMC8476748; doi:10.3389/fpsyg.2021.707803)
Supplement: Supplementary file 1 [file Data_Sheet_1.ZIP › Resiliance and Failure of Entreprenuership/210208.xlsx.txt.aggregated]

<dataInformation numberOfIndicators="30" numberOfCases="146" numberOfMissingValues="0">
   <indicatorInformation index="0" name="ESE1" mean="5.335616438356165" kurtosis="0.9529464233623268" skewNess="-1.2761179594963397" median="6.0" standardDeviation="1.5974182820879943" numberOfRecords="146" numberOfMissingValues="0" lowestValue="1.0" highestValue="7.0" numberOfStrings="0">
      <string>1.0</string>
      <string>2.0</string>
      <string>3.0</string>
      <string>4.0</string>
      <string>5.0</string>
      <string>6.0</string>
      <string>7.0</string>
      <errors class="java.util.ArrayList"/>
   </indicatorInformation>
   <indicatorInformation index="1" name="ESE2" mean="5.410958904109589" kurtosis="1.483060983215997" skewNess="-1.3821541088781961" median="6.0" standardDeviation="1.5818804176818722" numberOfRecords="146" numberOfMissingValues="0" lowestValue="1.0" highestValue="7.0" numberOfStrings="0">
      <string>1.0</string>
      <string>2.0</string>
      <string>3.0</string>
      <string>4.0</string>
      <string>5.0</string>
      <string>6.0</string>
      <string>7.0</string>
      <errors class="java.util.ArrayList"/>
   </indicatorInformation>
   <indicatorInformation index="2" name="ESE3" mean="5.493150684931507" kurtosis="1.8432336078184846" skewNess="-1.5724189749099517" median="6.0" standardDeviation="1.6437785378218202" numberOfRecords="146" numberOfMissingValues="0" lowestValue="1.0" highestValue="7.0" numberOfStrings="0">
      <string>1.0</string>
      <string>2.0</string>
      <string>3.0</string>
      <string>4.0</string>
      <string>5.0</string>
      <string>6.0</string>
      <string>7.0</string>
      <errors class="java.util.ArrayList"/>
   </indicatorInformation>
   <indicatorInformation index="3" name="ESE4" mean="5.568493150684931" kurtosis="1.6323851013382362" skewNess="-1.5175312558744452" median="6.0" standardDeviation="1.6340031280740641" numberOfRecords="146" numberOfMissingValues="0" lowestValue="1.0" highestValue="7.0" numberOfStrings="0">
      <string>1.0</string>
      <string>2.0</string>
      <string>3.0</string>
      <string>4.0</string>
      <string>5.0</string>
      <string>6.0</string>
      <string>7.0</string>
      <errors class="java.util.ArrayList"/>
   </indicatorInformation>
   <indicatorInformation index="4" name="ESE5" mean="5.678082191780822" kurtosis="2.5984972774420103" skewNess="-1.7791067028997805" median="6.0" standardDeviation="1.595949202280013" numberOfRecords="146" numberOfMissingValues="0" lowestValue="1.0" highestValue="7.0" numberOfStrings="0">
      <string>1.0</string>
      <string>2.0</string>
      <string>3.0</string>
      <string>4.0</string>
      <string>5.0</string>
      <string>6.0</string>
      <string>7.0</string>
      <errors class="java.util.ArrayList"/>
   </indicatorInformation>
   <indicatorInformation index="5" name="ILC1" mean="5.465753424657534" kurtosis="3.2090058033940214" skewNess="-1.7910001580565869" median="6.0" standardDeviation="1.4150094803963544" numberOfRecords="146" numberOfMissingValues="0" lowestValue="1.0" highestValue="7.0" numberOfStrings="0">
      <string>1.0</string>
      <string>3.0</string>
      <string>4.0</string>
      <string>5.0</string>
      <string>6.0</string>
      <string>7.0</string>
      <errors class="java.util.ArrayList"/>
   </indicatorInformation>
   <indicatorInformation index="6" name="ILC2" mean="5.226027397260274" kurtosis="1.5648872655991322" skewNess="-1.3347026125351933" median="6.0" standardDeviation="1.4466330675489558" numberOfRecords="146" numberOfMissingValues="0" lowestValue="1.0" highestValue="7.0" numberOfStrings="0">
      <string>1.0</string>
      <string>2.0</string>
      <string>3.0</string>
      <string>4.0</string>
      <string>5.0</string>
      <string>6.0</string>
      <string>7.0</string>
      <errors class="java.util.ArrayList"/>
   </indicatorInformation>
   <indicatorInformation index="7" name="ILC3" mean="4.965753424657534" kurtosis="0.6974649247359839" skewNess="-0.9460591006820812" median="5.0" standardDeviation="1.4306545276749263" numberOfRecords="146" numberOfMissingValues="0" lowestValue="1.0" highestValue="7.0" numberOfStrings="0">
      <string>1.0</string>
      <string>2.0</string>
      <string>3.0</string>
      <string>4.0</string>
      <string>5.0</string>
      <string>6.0</string>
      <string>7.0</string>
      <errors class="java.util.ArrayList"/>
   </indicatorInformation>
   <indicatorInformation index="8" name="ILC4" mean="5.013698630136986" kurtosis="0.5820649103710474" skewNess="-0.9936602279982912" median="5.0" standardDeviation="1.5438179916583386" numberOfRecords="146" numberOfMissingValues="0" lowestValue="1.0" highestValue="7.0" numberOfStrings="0">
      <string>1.0</string>
      <string>2.0</string>
      <string>3.0</string>
      <string>4.0</string>
      <string>5.0</string>
      <string>6.0</string>
      <string>7.0</string>
      <errors class="java.util.ArrayList"/>
   </indicatorInformation>
   <indicatorInformation index="9" name="ILC5" mean="5.301369863013699" kurtosis="0.9549752677769558" skewNess="-1.2473869308459724" median="6.0" standardDeviation="1.584902499112959" numberOfRecords="146" numberOfMissingValues="0" lowestValue="1.0" highestValue="7.0" numberOfStrings="0">
      <string>1.0</string>
      <string>2.0</string>
      <string>3.0</string>
      <string>4.0</string>
      <string>5.0</string>
      <string>6.0</string>
      <string>7.0</string>
      <errors class="java.util.ArrayList"/>
   </indicatorInformation>
   <indicatorInformation index="10" name="PLF1" mean="5.061643835616438" kurtosis="0.461967815823364" skewNess="-1.0083639130892852" median="6.0" standardDeviation="1.5492932668063812" numberOfRecords="146" numberOfMissingValues="0" lowestValue="1.0" highestValue="7.0" numberOfStrings="0">
      <string>1.0</string>
      <string>2.0</string>
      <string>3.0</string>
      <string>4.0</string>
      <string>5.0</string>
      <string>6.0</string>
      <string>7.0</string>
      <errors class="java.util.ArrayList"/>
   </indicatorInformation>
   <indicatorInformation index="11" name="PLF2" mean="5.431506849315069" kurtosis="1.0087349847271514" skewNess="-1.3012196550526152" median="6.0" standardDeviation="1.5611180321253928" numberOfRecords="146" numberOfMissingValues="0" lowestValue="1.0" highestValue="7.0" numberOfStrings="0">
      <string>1.0</string>
      <string>2.0</string>
      <string>3.0</string>
      <string>4.0</string>
      <string>5.0</string>
      <string>6.0</string>
      <string>7.0</string>
      <errors class="java.util.ArrayList"/>
   </indicatorInformation>
   <indicatorInformation index="12" name="PLF3" mean="5.5479452054794525" kurtosis="1.0799452397617713" skewNess="-1.2874757762125153" median="6.0" standardDeviation="1.5530887994301446" numberOfRecords="146" numberOfMissingValues="0" lowestValue="1.0" highestValue="7.0" numberOfStrings="0">
      <string>1.0</string>
      <string>2.0</string>
      <string>3.0</string>
      <string>4.0</string>
      <string>5.0</string>
      <string>6.0</string>
      <string>7.0</string>
      <errors class="java.util.ArrayList"/>
   </indicatorInformation>
   <indicatorInformation index="13" name="PLF4" mean="5.068493150684931" kurtosis="0.1903162930391753" skewNess="-0.8996219632260849" median="6.0" standardDeviation="1.5687772668440811" numberOfRecords="146" numberOfMissingValues="0" lowestValue="1.0" highestValue="7.0" numberOfStrings="0">
      <string>1.0</string>
      <string>2.0</string>
      <string>3.0</string>
      <string>4.0</string>
      <string>5.0</string>
      <string>6.0</string>
      <string>7.0</string>
      <errors class="java.util.ArrayList"/>
   </indicatorInformation>
   <indicatorInformation index="14" name="PLF5" mean="4.486301369863014" kurtosis="0.24905441662289007" skewNess="-0.6952064219063383" median="5.0" standardDeviation="1.278035207405487" numberOfRecords="146" numberOfMissingValues="0" lowestValue="1.0" highestValue="7.0" numberOfStrings="0">
      <string>1.0</string>
      <string>2.0</string>
      <string>3.0</string>
      <string>4.0</string>
      <string>5.0</string>
      <string>6.0</string>
      <string>7.0</string>
      <errors class="java.util.ArrayList"/>
   </indicatorInformation>
   <indicatorInformation index="15" name="REC1" mean="4.684931506849315" kurtosis="0.48039415987445677" skewNess="-0.8009166744831389" median="5.0" standardDeviation="1.3228933869049715" numberOfRecords="146" numberOfMissingValues="0" lowestValue="1.0" highestValue="7.0" numberOfStrings="0">
      <string>1.0</string>
      <string>2.0</string>
      <string>3.0</string>
      <string>4.0</string>
      <string>5.0</string>
      <string>6.0</string>
      <string>7.0</string>
      <errors class="java.util.ArrayList"/>
   </indicatorInformation>
   <indicatorInformation index="16" name="REC2" mean="4.232876712328767" kurtosis="0.3466231619484499" skewNess="-0.31920515415599104" median="4.0" standardDeviation="1.2221757820929018" numberOfRecords="146" numberOfMissingValues="0" lowestValue="1.0" highestValue="7.0" numberOfStrings="0">
      <string>1.0</string>
      <string>2.0</string>
      <string>3.0</string>
      <string>4.0</string>
      <string>5.0</string>
      <string>6.0</string>
      <string>7.0</string>
      <errors class="java.util.ArrayList"/>
   </indicatorInformation>
   <indicatorInformation index="17" name="REC3" mean="4.938356164383562" kurtosis="1.4723275440343602" skewNess="-1.218395694394832" median="5.0" standardDeviation="1.314943629916986" numberOfRecords="146" numberOfMissingValues="0" lowestValue="1.0" highestValue="7.0" numberOfStrings="0">
      <string>1.0</string>
      <string>2.0</string>
      <string>3.0</string>
      <string>4.0</string>
      <string>5.0</string>
      <string>6.0</string>
      <string>7.0</string>
      <errors class="java.util.ArrayList"/>
   </indicatorInformation>
   <indicatorInformation index="18" name="REC4" mean="4.609589041095891" kurtosis="0.4455696854393105" skewNess="-0.5847447163769656" median="5.0" standardDeviation="1.2787691410275297" numberOfRecords="146" numberOfMissingValues="0" lowestValue="1.0" highestValue="7.0" numberOfStrings="0">
      <string>1.0</string>
      <string>2.0</string>
      <string>3.0</string>
      <string>4.0</string>
      <string>5.0</string>
      <string>6.0</string>
      <string>7.0</string>
      <errors class="java.util.ArrayList"/>
   </indicatorInformation>
   <indicatorInformation index="19" name="REC5" mean="3.8698630136986303" kurtosis="-1.0695902976057596" skewNess="-0.006416294443789095" median="4.0" standardDeviation="1.5406087510138669" numberOfRecords="146" numberOfMissingValues="0" lowestValue="1.0" highestValue="7.0" numberOfStrings="0">
      <string>1.0</string>
      <string>2.0</string>
      <string>3.0</string>
      <string>4.0</string>
      <string>5.0</string>
      <string>6.0</string>
      <string>7.0</string>
      <errors class="java.util.ArrayList"/>
   </indicatorInformation>
   <indicatorInformation index="20" name="CEE1" mean="5.013698630136986" kurtosis="0.05544040286879737" skewNess="-0.9274397806852642" median="5.0" standardDeviation="1.5169648020129103" numberOfRecords="146" numberOfMissingValues="0" lowestValue="1.0" highestValue="7.0" numberOfStrings="0">
      <string>1.0</string>
      <string>2.0</string>
      <string>3.0</string>
      <string>4.0</string>
      <string>5.0</string>
      <string>6.0</string>
      <string>7.0</string>
      <errors class="java.util.ArrayList"/>
   </indicatorInformation>
   <indicatorInformation index="21" name="CEE2" mean="5.109589041095891" kurtosis="0.6520371078765255" skewNess="-1.1911678312677914" median="6.0" standardDeviation="1.4670970669030456" numberOfRecords="146" numberOfMissingValues="0" lowestValue="1.0" highestValue="7.0" numberOfStrings="0">
      <string>1.0</string>
      <string>2.0</string>
      <string>3.0</string>
      <string>4.0</string>
      <string>5.0</string>
      <string>6.0</string>
      <string>7.0</string>
      <errors class="java.util.ArrayList"/>
   </indicatorInformation>
   <indicatorInformation index="22" name="CEE3" mean="5.4520547945205475" kurtosis="2.013359346875131" skewNess="-1.5061720376193142" median="6.0" standardDeviation="1.419445153904428" numberOfRecords="146" numberOfMissingValues="0" lowestValue="1.0" highestValue="7.0" numberOfStrings="0">
      <string>1.0</string>
      <string>2.0</string>
      <string>3.0</string>
      <string>4.0</string>
      <string>5.0</string>
      <string>6.0</string>
      <string>7.0</string>
      <errors class="java.util.ArrayList"/>
   </indicatorInformation>
   <indicatorInformation index="23" name="CEE4" mean="5.157534246575342" kurtosis="0.35197447903840695" skewNess="-0.9940808856660178" median="6.0" standardDeviation="1.4367407758695896" numberOfRecords="146" numberOfMissingValues="0" lowestValue="1.0" highestValue="7.0" numberOfStrings="0">
      <string>1.0</string>
      <string>2.0</string>
      <string>3.0</string>
      <string>4.0</string>
      <string>5.0</string>
      <string>6.0</string>
      <string>7.0</string>
      <errors class="java.util.ArrayList"/>
   </indicatorInformation>
   <indicatorInformation index="24" name="CEE5" mean="4.212328767123288" kurtosis="-0.6605195794285339" skewNess="-0.25923456064458983" median="4.0" standardDeviation="1.3559049149875966" numberOfRecords="146" numberOfMissingValues="0" lowestValue="1.0" highestValue="7.0" numberOfStrings="0">
      <string>1.0</string>
      <string>2.0</string>
      <string>3.0</string>
      <string>4.0</string>
      <string>5.0</string>
      <string>6.0</string>
      <string>7.0</string>
      <errors class="java.util.ArrayList"/>
   </indicatorInformation>
   <indicatorInformation index="25" name="NOR1" mean="4.623287671232877" kurtosis="-0.27553738611375467" skewNess="-0.49703101601079636" median="5.0" standardDeviation="1.4341262002840447" numberOfRecords="146" numberOfMissingValues="0" lowestValue="1.0" highestValue="7.0" numberOfStrings="0">
      <string>1.0</string>
      <string>2.0</string>
      <string>3.0</string>
      <string>4.0</string>
      <string>5.0</string>
      <string>6.0</string>
      <string>7.0</string>
      <errors class="java.util.ArrayList"/>
   </indicatorInformation>
   <indicatorInformation index="26" name="NOR2" mean="5.376712328767123" kurtosis="-0.5354126159094577" skewNess="-0.4098489342933718" median="6.0" standardDeviation="1.1712328767123288" numberOfRecords="146" numberOfMissingValues="0" lowestValue="2.0" highestValue="7.0" numberOfStrings="0">
      <string>2.0</string>
      <string>3.0</string>
      <string>4.0</string>
      <string>5.0</string>
      <string>6.0</string>
      <string>7.0</string>
      <errors class="java.util.ArrayList"/>
   </indicatorInformation>
   <indicatorInformation index="27" name="NOR3" mean="5.239726027397261" kurtosis="-0.46175213813744254" skewNess="-0.4732514316435861" median="5.0" standardDeviation="1.2010543000998448" numberOfRecords="146" numberOfMissingValues="0" lowestValue="2.0" highestValue="7.0" numberOfStrings="0">
      <string>2.0</string>
      <string>3.0</string>
      <string>4.0</string>
      <string>5.0</string>
      <string>6.0</string>
      <string>7.0</string>
      <errors class="java.util.ArrayList"/>
   </indicatorInformation>
   <indicatorInformation index="28" name="NOR4" mean="5.287671232876712" kurtosis="-0.5693349100141072" skewNess="-0.376755593408958" median="5.0" standardDeviation="1.1876009206407259" numberOfRecords="146" numberOfMissingValues="0" lowestValue="2.0" highestValue="7.0" numberOfStrings="0">
      <string>2.0</string>
      <string>3.0</string>
      <string>4.0</string>
      <string>5.0</string>
      <string>6.0</string>
      <string>7.0</string>
      <errors class="java.util.ArrayList"/>
   </indicatorInformation>
   <indicatorInformation index="29" name="NOR5" mean="5.191780821917808" kurtosis="0.5244039399952154" skewNess="-0.7165021655246939" median="5.0" standardDeviation="1.3049697865244965" numberOfRecords="146" numberOfMissingValues="0" lowestValue="1.0" highestValue="7.0" numberOfStrings="0">
      <string>1.0</string>
      <string>2.0</string>
      <string>3.0</string>
      <string>4.0</string>
      <string>5.0</string>
      <string>6.0</string>
      <string>7.0</string>
      <errors class="java.util.ArrayList"/>
   </indicatorInformation>
   <indicatorCorrelations>
      <columns length="30">
         <string>ESE1</string>
         <string>ESE2</string>
         <string>ESE3</string>
         <string>ESE4</string>
         <string>ESE5</string>
         <string>ILC1</string>
         <string>ILC2</string>
         <string>ILC3</string>
         <string>ILC4</string>
         <string>ILC5</string>
         <string>PLF1</string>
         <string>PLF2</string>
         <string>PLF3</string>
         <string>PLF4</string>
         <string>PLF5</string>
         <string>REC1</string>
         <string>REC2</string>
         <string>REC3</string>
         <string>REC4</string>
         <string>REC5</string>
         <string>CEE1</string>
         <string>CEE2</string>
         <string>CEE3</string>
         <string>CEE4</string>
         <string>CEE5</string>
         <string>NOR1</string>
         <string>NOR2</string>
         <string>NOR3</string>
         <string>NOR4</string>
         <string>NOR5</string>
      </columns>
      <rows length="30">
         <string>ESE1</string>
         <string>ESE2</string>
         <string>ESE3</string>
         <string>ESE4</string>
         <string>ESE5</string>
         <string>ILC1</string>
         <string>ILC2</string>
         <string>ILC3</string>
         <string>ILC4</string>
         <string>ILC5</string>
         <string>PLF1</string>
         <string>PLF2</string>
         <string>PLF3</string>
         <string>PLF4</string>
         <string>PLF5</string>
         <string>REC1</string>
         <string>REC2</string>
         <string>REC3</string>
         <string>REC4</string>
         <string>REC5</string>
         <string>CEE1</string>
         <string>CEE2</string>
         <string>CEE3</string>
         <string>CEE4</string>
         <string>CEE5</string>
         <string>NOR1</string>
         <string>NOR2</string>
         <string>NOR3</string>
         <string>NOR4</string>
         <string>NOR5</string>
      </rows>
      <values length="900">
         <double>1.0000000000000009</double>
         <double>0.9212102211082662</double>
         <double>0.8290634136972974</double>
         <double>0.7771025017627509</double>
         <double>0.8000113796054624</double>
         <double>0.7762669821203081</double>
         <double>0.8000417748327686</double>
         <double>0.7393060894711185</double>
         <double>0.7008081786431154</double>
         <double>0.74731088784881</double>
         <double>0.7305752970148447</double>
         <double>0.7906208945729695</double>
         <double>0.7734351308124667</double>
         <double>0.6959857915537907</double>
         <double>0.5071714881972247</double>
         <double>0.5264925547868307</double>
         <double>0.44060210171206016</double>
         <double>0.6391796756463215</double>
         <double>0.500036564906836</double>
         <double>0.13463949800500874</double>
         <double>0.3768572311392226</double>
         <double>0.48114833183896955</double>
         <double>0.5402529643787926</double>
         <double>0.4514752545294001</double>
         <double>0.28016432680776204</double>
         <double>0.30334112330153085</double>
         <double>0.3168163816175762</double>
         <double>0.24009341863393416</double>
         <double>0.28848755595762987</double>
         <double>0.304264912430139</double>
         <double>0.0</double>
         <double>1.0000000000000013</double>
         <double>0.8782336213850108</double>
         <double>0.8370608952183461</double>
         <double>0.8256155950978213</double>
         <double>0.786574482746211</double>
         <double>0.8184168094222247</double>
         <double>0.7658668835019418</double>
         <double>0.7437295235139377</double>
         <double>0.7756460368401511</double>
         <double>0.710703673931833</double>
         <double>0.8129573851700971</double>
         <double>0.8032589410477043</double>
         <double>0.7200627153549425</double>
         <double>0.5414607919146704</double>
         <double>0.5822836950695548</double>
         <double>0.5031667667003323</double>
         <double>0.644397941564283</double>
         <double>0.5567347027447578</double>
         <double>0.16809004952710174</double>
         <double>0.40296309018471255</double>
         <double>0.46460876932194733</double>
         <double>0.518189639094542</double>
         <double>0.4235645231702058</double>
         <double>0.2818444781074611</double>
         <double>0.3158124042068916</double>
         <double>0.2676408319765974</double>
         <double>0.20410488400400803</double>
         <double>0.27978421788854047</double>
         <double>0.26375624302265516</double>
         <double>0.0</double>
         <double>0.0</double>
         <double>0.999999999999999</double>
         <double>0.8391454757164442</double>
         <double>0.8724945780551777</double>
         <double>0.8023362455303793</double>
         <double>0.7740253462690048</double>
         <double>0.7731745806151357</double>
         <double>0.7152799704098176</double>
         <double>0.7816245624240036</double>
         <double>0.6927098980454378</double>
         <double>0.8192370212459119</double>
         <double>0.8036628545951477</double>
         <double>0.7040453920164026</double>
         <double>0.5248678157504648</double>
         <double>0.5376184633914783</double>
         <double>0.5121947800138646</double>
         <double>0.6256453620512625</double>
         <double>0.5836204867545945</double>
         <double>0.13352832471214732</double>
         <double>0.39557800763059164</double>
         <double>0.44053826478877184</double>
         <double>0.5209142699085715</double>
         <double>0.3905315081903407</double>
         <double>0.238816608725626</double>
         <double>0.3344873147408936</double>
         <double>0.25926826178575674</double>
         <double>0.19684683231596722</double>
         <double>0.271171182272563</double>
         <double>0.23370375790622946</double>
         <double>0.0</double>
         <double>0.0</double>
         <double>0.0</double>
         <double>1.0</double>
         <double>0.8528705841055865</double>
         <double>0.7564112143025088</double>
         <double>0.7163976064927499</double>
         <double>0.7496043861062412</double>
         <double>0.6376946773287193</double>
         <double>0.7272818845315849</double>
         <double>0.6490245362411944</double>
         <double>0.7657466316652837</double>
         <double>0.7436215489569271</double>
         <double>0.6367727597660158</double>
         <double>0.47438484551021143</double>
         <double>0.5137930231909713</double>
         <double>0.4996137506128093</double>
         <double>0.5932965980252629</double>
         <double>0.5389081884456794</double>
         <double>0.09740955167243098</double>
         <double>0.3698957613882797</double>
         <double>0.40258637404810094</double>
         <double>0.47390913153585124</double>
         <double>0.37030693317655544</double>
         <double>0.19592719999629551</double>
         <double>0.2726060388502702</double>
         <double>0.27819911637726263</double>
         <double>0.18533120366503267</double>
         <double>0.2616244984867312</double>
         <double>0.2219013334107503</double>
         <double>0.0</double>
         <double>0.0</double>
         <double>0.0</double>
         <double>0.0</double>
         <double>0.9999999999999996</double>
         <double>0.8276696037231007</double>
         <double>0.7702174208281591</double>
         <double>0.7241246317959775</double>
         <double>0.6884295510075306</double>
         <double>0.7288583315064185</double>
         <double>0.6617677761127129</double>
         <double>0.7650249821431249</double>
         <double>0.7426527603443793</double>
         <double>0.6763148930528332</double>
         <double>0.4897901544442604</double>
         <double>0.5132005933905509</double>
         <double>0.5019540928430063</double>
         <double>0.5943433727594519</double>
         <double>0.5324488387214865</double>
         <double>0.08324690134854165</double>
         <double>0.33000032559575465</double>
         <double>0.427533437215894</double>
         <double>0.5207869099761062</double>
         <double>0.401478424043279</double>
         <double>0.2246629657093982</double>
         <double>0.30612097034567043</double>
         <double>0.2151114188910152</double>
         <double>0.10457923840852083</double>
         <double>0.21509210770789522</double>
         <double>0.19407985452003065</double>
         <double>0.0</double>
         <double>0.0</double>
         <double>0.0</double>
         <double>0.0</double>
         <double>0.0</double>
         <double>0.9999999999999994</double>
         <double>0.8720754059768788</double>
         <double>0.7725269743801073</double>
         <double>0.806010220036388</double>
         <double>0.8017258447101125</double>
         <double>0.6992463253764732</double>
         <double>0.7461935952618988</double>
         <double>0.7284907431555085</double>
         <double>0.7230652706267873</double>
         <double>0.5527058274184274</double>
         <double>0.6345616104879719</double>
         <double>0.570968435626589</double>
         <double>0.6780331160148151</double>
         <double>0.588789322523083</double>
         <double>0.19746766159817736</double>
         <double>0.38631665120681064</double>
         <double>0.4571187494905477</double>
         <double>0.5669668541124826</double>
         <double>0.4086260359165685</double>
         <double>0.3304377211663227</double>
         <double>0.38010380109533176</double>
         <double>0.1958268517329794</double>
         <double>0.11969102051937158</double>
         <double>0.19742705409570385</double>
         <double>0.18160133045367996</double>
         <double>0.0</double>
         <double>0.0</double>
         <double>0.0</double>
         <double>0.0</double>
         <double>0.0</double>
         <double>0.0</double>
         <double>1.0000000000000009</double>
         <double>0.7980047480154893</double>
         <double>0.8542650079233757</double>
         <double>0.7918116192193374</double>
         <double>0.7180582735302118</double>
         <double>0.745357624605664</double>
         <double>0.7649339801848514</double>
         <double>0.7597648965976538</double>
         <double>0.5555182863103743</double>
         <double>0.6205919557931795</double>
         <double>0.5203311430779205</double>
         <double>0.6374394058723464</double>
         <double>0.5808634487103538</double>
         <double>0.15764034276113342</double>
         <double>0.36688359584973745</double>
         <double>0.47886786977932183</double>
         <double>0.5439721673022727</double>
         <double>0.4409312690594206</double>
         <double>0.30726167197447674</double>
         <double>0.35137559736104246</double>
         <double>0.26910032845392745</double>
         <double>0.18957114399571562</double>
         <double>0.24122525249499088</double>
         <double>0.2636639945972778</double>
         <double>0.0</double>
         <double>0.0</double>
         <double>0.0</double>
         <double>0.0</double>
         <double>0.0</double>
         <double>0.0</double>
         <double>0.0</double>
         <double>1.0000000000000009</double>
         <double>0.7847916106964484</double>
         <double>0.802020648282646</double>
         <double>0.7765786200008936</double>
         <double>0.7947681773923435</double>
         <double>0.7790935219860969</double>
         <double>0.7517793069475835</double>
         <double>0.567264749094317</double>
         <double>0.613146341954494</double>
         <double>0.5255522943633852</double>
         <double>0.6724388610420823</double>
         <double>0.6216611519641404</double>
         <double>0.1595712566582036</double>
         <double>0.39471604807768956</double>
         <double>0.46517298299350796</double>
         <double>0.5405297911868068</double>
         <double>0.4324813589595052</double>
         <double>0.2544411210599126</double>
         <double>0.3041737526658257</double>
         <double>0.34288301936402976</double>
         <double>0.2519169519513674</double>
         <double>0.2839560048378916</double>
         <double>0.2823389456599429</double>
         <double>0.0</double>
         <double>0.0</double>
         <double>0.0</double>
         <double>0.0</double>
         <double>0.0</double>
         <double>0.0</double>
         <double>0.0</double>
         <double>0.0</double>
         <double>1.000000000000004</double>
         <double>0.8353016272714294</double>
         <double>0.7527825225959416</double>
         <double>0.7392943901694728</double>
         <double>0.7281680106738744</double>
         <double>0.7518785277865542</double>
         <double>0.6284236715022246</double>
         <double>0.6627952274457601</double>
         <double>0.5827537363681228</double>
         <double>0.6785881484322661</double>
         <double>0.5994520289846416</double>
         <double>0.24265070239869585</double>
         <double>0.40059843707543025</double>
         <double>0.47109249810938625</double>
         <double>0.5535296808855865</double>
         <double>0.4529582051718413</double>
         <double>0.29636833214371283</double>
         <double>0.3364392204931396</double>
         <double>0.2092729775875921</double>
         <double>0.16814961799860312</double>
         <double>0.1771677721946545</double>
         <double>0.2196815609128119</double>
         <double>0.0</double>
         <double>0.0</double>
         <double>0.0</double>
         <double>0.0</double>
         <double>0.0</double>
         <double>0.0</double>
         <double>0.0</double>
         <double>0.0</double>
         <double>0.0</double>
         <double>1.0000000000000007</double>
         <double>0.8962001685397317</double>
         <double>0.8748120624452184</double>
         <double>0.873426481040837</double>
         <double>0.7850680291258697</double>
         <double>0.6377489808166833</double>
         <double>0.6529082861579592</double>
         <double>0.5118465349141337</double>
         <double>0.682652575906849</double>
         <double>0.632568322641633</double>
         <double>0.22644660533504224</double>
         <double>0.4569472161966078</double>
         <double>0.5248558296001732</double>
         <double>0.6183813812578794</double>
         <double>0.4333463972011823</double>
         <double>0.26982424713933767</double>
         <double>0.354301895938164</double>
         <double>0.26354179893690666</double>
         <double>0.24630228497984258</double>
         <double>0.26324939137146003</double>
         <double>0.2204287187021134</double>
         <double>0.0</double>
         <double>0.0</double>
         <double>0.0</double>
         <double>0.0</double>
         <double>0.0</double>
         <double>0.0</double>
         <double>0.0</double>
         <double>0.0</double>
         <double>0.0</double>
         <double>0.0</double>
         <double>0.9999999999999992</double>
         <double>0.8357399667592271</double>
         <double>0.8456172163648021</double>
         <double>0.753506368722906</double>
         <double>0.5971316301722921</double>
         <double>0.5943022986132482</double>
         <double>0.45181075502007456</double>
         <double>0.6675545397673519</double>
         <double>0.5860385204286005</double>
         <double>0.2788424328960595</double>
         <double>0.4688470515660414</double>
         <double>0.5394372437138911</double>
         <double>0.6008942532840967</double>
         <double>0.48488888601859115</double>
         <double>0.3067773688051226</double>
         <double>0.38037113403892797</double>
         <double>0.30049388470316796</double>
         <double>0.29020912678735716</double>
         <double>0.28072264575266864</double>
         <double>0.20080618675585524</double>
         <double>0.0</double>
         <double>0.0</double>
         <double>0.0</double>
         <double>0.0</double>
         <double>0.0</double>
         <double>0.0</double>
         <double>0.0</double>
         <double>0.0</double>
         <double>0.0</double>
         <double>0.0</double>
         <double>0.0</double>
         <double>0.9999999999999982</double>
         <double>0.8940475848797943</double>
         <double>0.7849992014593216</double>
         <double>0.6260447050368174</double>
         <double>0.6196951094679992</double>
         <double>0.5504290846205422</double>
         <double>0.6836146854372763</double>
         <double>0.6024674726072091</double>
         <double>0.248329724060043</double>
         <double>0.4834020268400727</double>
         <double>0.5505498504573817</double>
         <double>0.6074363174149681</double>
         <double>0.45523830972680734</double>
         <double>0.2997107781621167</double>
         <double>0.3510038796797655</double>
         <double>0.2557288654588348</double>
         <double>0.24437517936341685</double>
         <double>0.2729282173555817</double>
         <double>0.22162242663483211</double>
         <double>0.0</double>
         <double>0.0</double>
         <double>0.0</double>
         <double>0.0</double>
         <double>0.0</double>
         <double>0.0</double>
         <double>0.0</double>
         <double>0.0</double>
         <double>0.0</double>
         <double>0.0</double>
         <double>0.0</double>
         <double>0.0</double>
         <double>1.0000000000000002</double>
         <double>0.7885954150908185</double>
         <double>0.5662467773874464</double>
         <double>0.6074177020284075</double>
         <double>0.44877880601048875</double>
         <double>0.6571250143883041</double>
         <double>0.5905352983365605</double>
         <double>0.19869481778127993</double>
         <double>0.48522412187153285</double>
         <double>0.5447898301327578</double>
         <double>0.6519457299628647</double>
         <double>0.46471902800108444</double>
         <double>0.2830148675756109</double>
         <double>0.3755871161635931</double>
         <double>0.2517639533289083</double>
         <double>0.2270025247470364</double>
         <double>0.25246532960112383</double>
         <double>0.16443736042577217</double>
         <double>0.0</double>
         <double>0.0</double>
         <double>0.0</double>
         <double>0.0</double>
         <double>0.0</double>
         <double>0.0</double>
         <double>0.0</double>
         <double>0.0</double>
         <double>0.0</double>
         <double>0.0</double>
         <double>0.0</double>
         <double>0.0</double>
         <double>0.0</double>
         <double>1.0000000000000007</double>
         <double>0.574389242698403</double>
         <double>0.5747595529384473</double>
         <double>0.5168141140682075</double>
         <double>0.6196245519003764</double>
         <double>0.5766787201298521</double>
         <double>0.2672461749758154</double>
         <double>0.46010647894830886</double>
         <double>0.5353873335007823</double>
         <double>0.5459027972305079</double>
         <double>0.4844655856175227</double>
         <double>0.40532371383247856</double>
         <double>0.46508077493609556</double>
         <double>0.2990852298444586</double>
         <double>0.25665206831149767</double>
         <double>0.30191289223665174</double>
         <double>0.22109037644475224</double>
         <double>0.0</double>
         <double>0.0</double>
         <double>0.0</double>
         <double>0.0</double>
         <double>0.0</double>
         <double>0.0</double>
         <double>0.0</double>
         <double>0.0</double>
         <double>0.0</double>
         <double>0.0</double>
         <double>0.0</double>
         <double>0.0</double>
         <double>0.0</double>
         <double>0.0</double>
         <double>1.0000000000000024</double>
         <double>0.7874235681645354</double>
         <double>0.6641789419046252</double>
         <double>0.7718337471208988</double>
         <double>0.7867211446618306</double>
         <double>0.4008798091155881</double>
         <double>0.4911670389345506</double>
         <double>0.4902979217928196</double>
         <double>0.5395484237107337</double>
         <double>0.42454689874394413</double>
         <double>0.343572250434991</double>
         <double>0.41759104655820267</double>
         <double>0.22994646364746812</double>
         <double>0.24086303562547717</double>
         <double>0.22822994883257783</double>
         <double>0.24798339149236656</double>
         <double>0.0</double>
         <double>0.0</double>
         <double>0.0</double>
         <double>0.0</double>
         <double>0.0</double>
         <double>0.0</double>
         <double>0.0</double>
         <double>0.0</double>
         <double>0.0</double>
         <double>0.0</double>
         <double>0.0</double>
         <double>0.0</double>
         <double>0.0</double>
         <double>0.0</double>
         <double>0.0</double>
         <double>1.0000000000000002</double>
         <double>0.6723560066037474</double>
         <double>0.8629490232734744</double>
         <double>0.7734940051200452</double>
         <double>0.35291969330990786</double>
         <double>0.479982269163663</double>
         <double>0.5224512123463174</double>
         <double>0.5865093330755855</double>
         <double>0.4909864151119165</double>
         <double>0.33132046536881743</double>
         <double>0.42843050223371537</double>
         <double>0.12965009858594365</double>
         <double>0.09064527607312353</double>
         <double>0.10128724556980506</double>
         <double>0.13418997496066443</double>
         <double>0.0</double>
         <double>0.0</double>
         <double>0.0</double>
         <double>0.0</double>
         <double>0.0</double>
         <double>0.0</double>
         <double>0.0</double>
         <double>0.0</double>
         <double>0.0</double>
         <double>0.0</double>
         <double>0.0</double>
         <double>0.0</double>
         <double>0.0</double>
         <double>0.0</double>
         <double>0.0</double>
         <double>0.0</double>
         <double>0.9999999999999996</double>
         <double>0.6865794438854572</double>
         <double>0.6103673392502329</double>
         <double>0.2816439347703653</double>
         <double>0.37140863282849373</double>
         <double>0.4135982505479784</double>
         <double>0.4052003040927301</double>
         <double>0.38477336701387854</double>
         <double>0.32561525474044295</double>
         <double>0.34313203805436204</double>
         <double>0.17317299537830255</double>
         <double>0.13461279283790095</double>
         <double>0.16147768656319172</double>
         <double>0.13518863343457926</double>
         <double>0.0</double>
         <double>0.0</double>
         <double>0.0</double>
         <double>0.0</double>
         <double>0.0</double>
         <double>0.0</double>
         <double>0.0</double>
         <double>0.0</double>
         <double>0.0</double>
         <double>0.0</double>
         <double>0.0</double>
         <double>0.0</double>
         <double>0.0</double>
         <double>0.0</double>
         <double>0.0</double>
         <double>0.0</double>
         <double>0.0</double>
         <double>0.9999999999999987</double>
         <double>0.7922037219579554</double>
         <double>0.38147623782085127</double>
         <double>0.5704203649108842</double>
         <double>0.607075180949247</double>
         <double>0.6497745299097137</double>
         <double>0.5670845133911775</double>
         <double>0.3914999055959212</double>
         <double>0.4816455673671921</double>
         <double>0.1751811067946464</double>
         <double>0.15247399332275682</double>
         <double>0.1560938418186018</double>
         <double>0.16255921785868535</double>
         <double>0.0</double>
         <double>0.0</double>
         <double>0.0</double>
         <double>0.0</double>
         <double>0.0</double>
         <double>0.0</double>
         <double>0.0</double>
         <double>0.0</double>
         <double>0.0</double>
         <double>0.0</double>
         <double>0.0</double>
         <double>0.0</double>
         <double>0.0</double>
         <double>0.0</double>
         <double>0.0</double>
         <double>0.0</double>
         <double>0.0</double>
         <double>0.0</double>
         <double>0.999999999999998</double>
         <double>0.3184004474506075</double>
         <double>0.4652985559366132</double>
         <double>0.4901165451917618</double>
         <double>0.5123078332811579</double>
         <double>0.4920201625892726</double>
         <double>0.4151832257114014</double>
         <double>0.4912288361251776</double>
         <double>0.28569414635193147</double>
         <double>0.27053667197667863</double>
         <double>0.29945711125081614</double>
         <double>0.25829896787074563</double>
         <double>0.0</double>
         <double>0.0</double>
         <double>0.0</double>
         <double>0.0</double>
         <double>0.0</double>
         <double>0.0</double>
         <double>0.0</double>
         <double>0.0</double>
         <double>0.0</double>
         <double>0.0</double>
         <double>0.0</double>
         <double>0.0</double>
         <double>0.0</double>
         <double>0.0</double>
         <double>0.0</double>
         <double>0.0</double>
         <double>0.0</double>
         <double>0.0</double>
         <double>0.0</double>
         <double>0.9999999999999994</double>
         <double>0.6074287558345731</double>
         <double>0.500260440622398</double>
         <double>0.3745653081010691</double>
         <double>0.4177227225881436</double>
         <double>0.6001473664505551</double>
         <double>0.4831180067074571</double>
         <double>0.042352568905717515</double>
         <double>0.03536824360257053</double>
         <double>0.046666237866966456</double>
         <double>0.005600318321806276</double>
         <double>0.0</double>
         <double>0.0</double>
         <double>0.0</double>
         <double>0.0</double>
         <double>0.0</double>
         <double>0.0</double>
         <double>0.0</double>
         <double>0.0</double>
         <double>0.0</double>
         <double>0.0</double>
         <double>0.0</double>
         <double>0.0</double>
         <double>0.0</double>
         <double>0.0</double>
         <double>0.0</double>
         <double>0.0</double>
         <double>0.0</double>
         <double>0.0</double>
         <double>0.0</double>
         <double>0.0</double>
         <double>1.000000000000005</double>
         <double>0.7841145734632916</double>
         <double>0.7191933984604116</double>
         <double>0.6369637031968579</double>
         <double>0.5513635692645967</double>
         <double>0.6540823974930435</double>
         <double>0.08576133846655866</double>
         <double>0.05834666633836724</double>
         <double>0.039633544266757616</double>
         <double>0.054032265174576856</double>
         <double>0.0</double>
         <double>0.0</double>
         <double>0.0</double>
         <double>0.0</double>
         <double>0.0</double>
         <double>0.0</double>
         <double>0.0</double>
         <double>0.0</double>
         <double>0.0</double>
         <double>0.0</double>
         <double>0.0</double>
         <double>0.0</double>
         <double>0.0</double>
         <double>0.0</double>
         <double>0.0</double>
         <double>0.0</double>
         <double>0.0</double>
         <double>0.0</double>
         <double>0.0</double>
         <double>0.0</double>
         <double>0.0</double>
         <double>1.0000000000000024</double>
         <double>0.7294018187687115</double>
         <double>0.6904413857622907</double>
         <double>0.5254378948290465</double>
         <double>0.6218656721183361</double>
         <double>0.09954257002319325</double>
         <double>0.03562287037513225</double>
         <double>0.017286216264655766</double>
         <double>0.046263338849765204</double>
         <double>0.0</double>
         <double>0.0</double>
         <double>0.0</double>
         <double>0.0</double>
         <double>0.0</double>
         <double>0.0</double>
         <double>0.0</double>
         <double>0.0</double>
         <double>0.0</double>
         <double>0.0</double>
         <double>0.0</double>
         <double>0.0</double>
         <double>0.0</double>
         <double>0.0</double>
         <double>0.0</double>
         <double>0.0</double>
         <double>0.0</double>
         <double>0.0</double>
         <double>0.0</double>
         <double>0.0</double>
         <double>0.0</double>
         <double>0.0</double>
         <double>1.0000000000000009</double>
         <double>0.7308268073372739</double>
         <double>0.4981783292555137</double>
         <double>0.6051778493938382</double>
         <double>0.07472232871040076</double>
         <double>0.03687379423670531</double>
         <double>0.036623600308118356</double>
         <double>0.06042903438846883</double>
         <double>0.0</double>
         <double>0.0</double>
         <double>0.0</double>
         <double>0.0</double>
         <double>0.0</double>
         <double>0.0</double>
         <double>0.0</double>
         <double>0.0</double>
         <double>0.0</double>
         <double>0.0</double>
         <double>0.0</double>
         <double>0.0</double>
         <double>0.0</double>
         <double>0.0</double>
         <double>0.0</double>
         <double>0.0</double>
         <double>0.0</double>
         <double>0.0</double>
         <double>0.0</double>
         <double>0.0</double>
         <double>0.0</double>
         <double>0.0</double>
         <double>0.0</double>
         <double>0.9999999999999988</double>
         <double>0.6508553476362614</double>
         <double>0.7002812099267087</double>
         <double>0.14789653679246179</double>
         <double>0.049560981334989394</double>
         <double>0.05773838605530018</double>
         <double>0.08252130084024432</double>
         <double>0.0</double>
         <double>0.0</double>
         <double>0.0</double>
         <double>0.0</double>
         <double>0.0</double>
         <double>0.0</double>
         <double>0.0</double>
         <double>0.0</double>
         <double>0.0</double>
         <double>0.0</double>
         <double>0.0</double>
         <double>0.0</double>
         <double>0.0</double>
         <double>0.0</double>
         <double>0.0</double>
         <double>0.0</double>
         <double>0.0</double>
         <double>0.0</double>
         <double>0.0</double>
         <double>0.0</double>
         <double>0.0</double>
         <double>0.0</double>
         <double>0.0</double>
         <double>0.0</double>
         <double>1.000000000000001</double>
         <double>0.7632125834105541</double>
         <double>0.08333450977580407</double>
         <double>0.09492002193444968</double>
         <double>0.12370137232835347</double>
         <double>0.08924393440746159</double>
         <double>0.0</double>
         <double>0.0</double>
         <double>0.0</double>
         <double>0.0</double>
         <double>0.0</double>
         <double>0.0</double>
         <double>0.0</double>
         <double>0.0</double>
         <double>0.0</double>
         <double>0.0</double>
         <double>0.0</double>
         <double>0.0</double>
         <double>0.0</double>
         <double>0.0</double>
         <double>0.0</double>
         <double>0.0</double>
         <double>0.0</double>
         <double>0.0</double>
         <double>0.0</double>
         <double>0.0</double>
         <double>0.0</double>
         <double>0.0</double>
         <double>0.0</double>
         <double>0.0</double>
         <double>0.0</double>
         <double>1.0000000000000004</double>
         <double>0.10895310564278289</double>
         <double>0.05640587943639659</double>
         <double>0.08775707999852962</double>
         <double>0.04958299415922234</double>
         <double>0.0</double>
         <double>0.0</double>
         <double>0.0</double>
         <double>0.0</double>
         <double>0.0</double>
         <double>0.0</double>
         <double>0.0</double>
         <double>0.0</double>
         <double>0.0</double>
         <double>0.0</double>
         <double>0.0</double>
         <double>0.0</double>
         <double>0.0</double>
         <double>0.0</double>
         <double>0.0</double>
         <double>0.0</double>
         <double>0.0</double>
         <double>0.0</double>
         <double>0.0</double>
         <double>0.0</double>
         <double>0.0</double>
         <double>0.0</double>
         <double>0.0</double>
         <double>0.0</double>
         <double>0.0</double>
         <double>0.0</double>
         <double>1.000000000000002</double>
         <double>0.8511774546581489</double>
         <double>0.8429106098925304</double>
         <double>0.7952148205297631</double>
         <double>0.0</double>
         <double>0.0</double>
         <double>0.0</double>
         <double>0.0</double>
         <double>0.0</double>
         <double>0.0</double>
         <double>0.0</double>
         <double>0.0</double>
         <double>0.0</double>
         <double>0.0</double>
         <double>0.0</double>
         <double>0.0</double>
         <double>0.0</double>
         <double>0.0</double>
         <double>0.0</double>
         <double>0.0</double>
         <double>0.0</double>
         <double>0.0</double>
         <double>0.0</double>
         <double>0.0</double>
         <double>0.0</double>
         <double>0.0</double>
         <double>0.0</double>
         <double>0.0</double>
         <double>0.0</double>
         <double>0.0</double>
         <double>0.0</double>
         <double>1.0000000000000024</double>
         <double>0.8832224610110477</double>
         <double>0.7572716708919643</double>
         <double>0.0</double>
         <double>0.0</double>
         <double>0.0</double>
         <double>0.0</double>
         <double>0.0</double>
         <double>0.0</double>
         <double>0.0</double>
         <double>0.0</double>
         <double>0.0</double>
         <double>0.0</double>
         <double>0.0</double>
         <double>0.0</double>
         <double>0.0</double>
         <double>0.0</double>
         <double>0.0</double>
         <double>0.0</double>
         <double>0.0</double>
         <double>0.0</double>
         <double>0.0</double>
         <double>0.0</double>
         <double>0.0</double>
         <double>0.0</double>
         <double>0.0</double>
         <double>0.0</double>
         <double>0.0</double>
         <double>0.0</double>
         <double>0.0</double>
         <double>0.0</double>
         <double>0.9999999999999984</double>
         <double>0.7952733724641601</double>
         <double>0.0</double>
         <double>0.0</double>
         <double>0.0</double>
         <double>0.0</double>
         <double>0.0</double>
         <double>0.0</double>
         <double>0.0</double>
         <double>0.0</double>
         <double>0.0</double>
         <double>0.0</double>
         <double>0.0</double>
         <double>0.0</double>
         <double>0.0</double>
         <double>0.0</double>
         <double>0.0</double>
         <double>0.0</double>
         <double>0.0</double>
         <double>0.0</double>
         <double>0.0</double>
         <double>0.0</double>
         <double>0.0</double>
         <double>0.0</double>
         <double>0.0</double>
         <double>0.0</double>
         <double>0.0</double>
         <double>0.0</double>
         <double>0.0</double>
         <double>0.0</double>
         <double>0.0</double>
         <double>1.000000000000001</double>
      </values>
   </indicatorCorrelations>
</dataInformation>
