# Supplementary material for: Entrepreneurship Resilience: Can Psychological Traits of Entrepreneurial Intention Support Overcoming Entrepreneurial Failure?
Source: Front Psychol. 2021 Sep 14;12:707803. doi: 10.3389/fpsyg.2021.707803 (PMC8476748; doi:10.3389/fpsyg.2021.707803)
Supplement: Supplementary file 1 [file Data_Sheet_1.ZIP › Resiliance and Failure of Entreprenuership/210208.xlsx.txt.meta]

<DataFileSettings locked="false" separator="COMMA" missingValue="null" escapeSign="NONE" locale="EN">
   <groupModel/>
   <text></text>
   <active>true</active>
</DataFileSettings>
