# Supplementary material for: Entrepreneurship Resilience: Can Psychological Traits of Entrepreneurial Intention Support Overcoming Entrepreneurial Failure?
Source: Front Psychol. 2021 Sep 14;12:707803. doi: 10.3389/fpsyg.2021.707803 (PMC8476748; doi:10.3389/fpsyg.2021.707803)
Supplement: Supplementary file 1 [file Data_Sheet_1.ZIP › Resiliance and Failure of Entreprenuership/Resiliance and Failure of Entreprenuership.splsm]

iGSsnvtZMzKPNvFO+xGucw7RdCku2vbEypPUYmZz/ude83vsPOSDXxYHmNE//bplgQMd4yYSC22v
IJcMbd7Uzyc5qTeUX1qOrt+MmlX6th19T+CZlr9e1WgwlOhGZZsAkpRTBcadH9iCdmxdJNSkuvLi
eiRgre+tj6jB2comqqAFdTJUYmXjJ5OmolTZYFsU9ObK8TAfaFrJ2TOOeJHW246Xy1Z88iSO8d+g
epvwXQXum8EJaRwpP0ynAgD+crfrsrN1kGdVu/PFfHYspQ/diosOYM3kwBzb+LAHWqHfV7cWLFGa
S9e7/+VasXEunpe1wRhGFi17tP/3TcNsEOh9ABUXgvmEKklByDvjQad2d282Ds+9qUBUI77741s/
xu/mVUwIaw7Q/FOMqOQbSMJTR818EnFGMPdAs1QdJRAuH2H0DDPKzOY2pq3PSK916jhoGi5cFxdv
ts6qiPCy5odeizdKBZayIxctM684di0c4Uyzj+4TNyunT7onVopmbU3TSjfgiXwD9Zlm1pA+y2qz
ET5b10U/SRClR6AtQ9AZv+3Xw0OV/JfCsu9kbbgWHqmkrsEHAWX9OaAW6eauMJvM0jkH18QxYOKc
xUzDaqrcIhbYmwC5h9RVcjGGw/cgOIkxd1YDE9QVHdzRRog48UW5HdQyWxtPufNw8ySA33oldhb0
5srxMB9oWsnZM454kdbbjpfLVnzyJI7x36B6m/BdBViTBfcFSSaPphq/JrSqSoKys3WQZ1W788V8
diylD92KOXQb+VovtKKsjbIbhqbU3VpF2byKsR3I9bFnSTQQtao2of3PHjqls2JjFQRmhXTbC+Z/
i+Wu8EhhhSk9ALKS6x1R/BJyGCWIav99Sm3SnvNbX2bJMnKtXjZ/sIvfz1KjS2l8Qs39xTDTMXb9
VkGgWpsA0WJblaDhotS/Aj7gMRGot21TBEMuL6d5+K0MamEfGxh0GhJPjPi3pij/S3rjdHxVqNh+
gfPR/Wm9O3pxtvNn5Q6KN/yCBIFu0ZrwdEn/R6dlALp67DN+Lo9CVyx+dCb561+8mIrNpY6LnL/4
vJUEcsCFn+1QdS/SCgOuO/EAsIsCij03KBG1RwHN2qz6ZHVdtsKEZdruO+lE46GknwKd4ibFKPcF
CpUUMTkwvNdQS01q54GGlqcsxo7M0uuMjWyE+ivm/W1mJLicYhyDnPOWKse2pVHX3yGAhNadW9hW
ygtqx1KHEXUfhbdiA7D9lbKzdZBnVbvzxXx2LKUP3Yrsg2ly2fdeoKZ3gwFOkbjsESDLYj16PcJW
eDhGhElNCyDvtpH/icdPlLIcYv1QAl4VF4L5hCpJQcg740GndndvNg7PvalAVCO+++NbP8bv5lVM
CGsO0PxTjKjkG0jCU0fNfBJxRjD3QLNUHSUQLh9h9AwzyszmNqatz0ivdeo4aBouXBcXb7bOqojw
suaHXos3SgWWsiMXLTOvOHYtHOFMs4/uEzcrp0+6J1aKZm1N00o34Il8A/WZZtaQPstqsxE+W9dF
P0kQpUegLUPQGb/t18NDlfyXwrLvZG24Fh6ppHIOutzjHctwrfDu1G51os1kCzD4v9OOyw4S7ShR
tW4xKlIVupUhhaO7FenWDD1pAtZggOfHk6il44NZS3qOIa5/j3ztB3dhWikVzxaRa9pBQ1ZXpaUI
nFQcdnGKIGU4X3D2SDFwRQCa7Dp1N1fvisreqw4ESXaRF9tFAzT3aOVIRWFqKgPlWUXmUnuBUK5z
JkOKeoyvVDfsidd1j7n/TZdmcRLZSpTHUbwgS7Y7rR1MeBjWB58VskiF3H0VE7MlPzUPAdIgbml+
TqA09UEShPLmqQa/LyHVJlX8DnT0oJpYygoyAS2WarHjQVCBkH+dbySw37Z1LBFBm6KG5Vkxb+02
DFTVwplr8QUvmTqiEKMSuoMetiIAruiJKCxjk8asmY6VQlSqC+3Fyg+SjtooydWOLZFf+eR+OOrP
W01tyVgx5obRwJEkQL2IN+BvBk7uQYKEBCTo9SUT8PudbOcMXzCpsJmW++A0QDKFKAxczTifb9d0
ofxiCTEfYqVtuR8zUrCLAoo9NygRtUcBzdqs+mR1XbbChGXa7jvpROOhpJ8CneImxSj3BQqVFDE5
MLzXUEtNaueBhpanLMaOzNLrjI1shPor5v1tZiS4nGIcg5zzB88Y2kc+NI+XUHk/vwn8ScZhCTNT
CqC1a+/p4gcT7F7rkY90vWGiSV24oGi4u2Nb73ZfQS+3rsFYKFy/EFoEb5LgRP19mR4rnxYUPp3+
NdEV7oSuyg7auW1cs3Kg/itJ1jXS3nYdnUTO2XyQvfxvr3lxo4Xo3y/zy6H4rYHsXjQBqp3Vin18
TIakec1KB+d2Pl/+2n7n9g7/w9MAGBZgKhEh5inzvG9gZaTvlar1ALlvtOnsB3u4hA9NywQGkpmk
IVG0i9cVz/qhXG6irPLZ5W1MVmD7AhwvECfG+CcSQS0Ke0Ir8V2bXwhsDo/Mv1gEKU0lmuD+ZVVJ
97R46gkvBONHCypJhllarEEdwWgkHE/+AKylYhLNgjX2YrPiwbPGgR4laVE4Fqb247+JzfUOk2Js
9QKG9EH9ZLDM3GoFUDAsgFygURpVweSi6bBD4jt25lBqkbgiyFPbd8cyLpdlO9+XfcaZ0EcFRhjF
mgkLl5FtkgRqs9thrUuGaTSzDUqhKBDk1U19pGpdE7l/tHi7mFMKoaWuPoxqkMN3wYCsPJ30T2v6
4PQJMOk9YkWkwGs9QufRnhgfUVToCYk0r6G6RdO0bODLoWpd6hbjU3+AxB6YPZYL+uwhAYmvw5oX
GguPTlmklm9kp/i68dt25sA8RjXLU9LqM7d2tmIWdvmy5C0OPERZW5hEZjTWBX+x+dGjNqEDTcIr
kTkAB2AuJO4J/P9fgVxcapW46BEQ4x0BFfdgM74PGD24Eqgdi8F60K02AiWxbNbaPJRcUqFmtspQ
TeEF7h2O1ZLS+9wFARFlbExqudwmoYkufrql6ssqMdJo4T4wS0iaZkwmwFXblNq9OT+4eSEey+8g
vuo7jlU4W+IvKVNFbXHHPevOF2R8idhKnjK+Qh/NaB5KCMmLqFurqx3kr0Lok2BrX+17bWyQ+XqV
Ooy2WhgG51gNuGarjfa3g71Ju8IsKNwR/58hx0AbHtVJ1Lp9XOsbQJvJd8gUF9HAVotb1w2MG1jo
OqIGVTfXQHkp73vMLf6ae0V+kWESqrSxLBCJvH/wUJ5WRKiKLnmmtkMfCckRvWC+fLbJ31KPZRIW
9zQpJAV1SxSzGpJNnEP4QAhG1JbA/T3JRVb99ihqbVR8bOpAEAAt+BhYf4YbmN1i5cPwQ0+NCPPr
Gqqpak08j5TFQLCSXf/QD+N1HDC4+iSr99hqXL1OQGb6/5VF/44hHmoeFsajl42UYVFp84GCjh1f
tHe+AEUJad8qN5tLcEQqpN1ZLOn/zRdOFrRLmSiKXU5JgNq0PORzwwfknLHrbxOs9N3JaVc3soaX
PWTa7/QQvzu2OjdVIgJSEu0xXLzmv61HSnB4HjfWCAkaVOyzItjFMDBfQmIJyx8ldaH4uo2lrucl
55BTx1r3/+dXyY4hSf0qZJkgeF5ltOH+Adgx3YcgfpMswf6ifr5cTLvBE+PY5PPA+nNhvSY++AWd
srcPJ6UwPHbl8HQoazKiys18EnFGMPdAs1QdJRAuH2Eur/XtBGfr0VKApHvtAvB5IlNH1oC5DJtW
r9ltMcmaoYHY4cs+7cY3d9A7Ljc6SSxP2RZvjsKaW5KbfnczgW8d4LA48cnfwun+3NC2scyJVCyO
y9YTwPSXKcys3aEqSwXmEx70dL6abkWB7K5LPZHJdKleBEGN/2qL9bhsrVNf3Y8ZdzAQ0EB6dla8
qjUSUqaH5SjWRzQMo+mO3IHcuiS1KpRI1dZ8RL+AEpswrx20KYWAVIs0TNGQYpVMBh6AMJokJX4V
jg5RkhHXYhD/ajgsozj7QALedMXq9caZuIdJVcLwEHIIta/6YlXJWzFmciDQUlIl+fODLOf93Cfi
ppZh4DrOO/WKQ7Xe1zBBRejXvXolFnKUq+4PZbOwdhPRwC2x91TxlxJjM/BL9JDRREkCrSKNeIwb
KOiLyCKIU28ZYybJhiKfUHOOG+e6NgY4XVj8jmc1TXoBjwy9rfrHoFb6PYlOtW0K4P1+oQcTazRD
De4Vr23j4LreM74BMfmITBiXPAmWz+LU2vutVzvNBoG3u52o9JI64NR3Vp/tG6yas1YFhbJQ0a5V
pq6jvkUp+6nmkmfeNdEYg3v/zf96NzFcxUC0LSKuXL3emRYO81lGIvnej+NqilojJXNzOdkTivqG
e/uTCB3rCcY2PgLq/sKoGfpXOBiGPEVazbcPRvdJgQ8Igx/53zCClk4HvlcC7yG0zS1MXIVay6TB
noQkQf5NSuPXUcwgupnYU2JMs8eJB0tpfELN/cUw0zF2/VZBoFqbANFiW5Wg4aLUvwI+4DERnYfJ
QWNfynTmBBRGfq36GxsYdBoST4z4t6Yo/0t643R8VajYfoHz0f1pvTt6cbbzZ+UOijf8ggSBbtGa
8HRJ/ySwmD1YS4hW3H/p1u5fRU0LNzih2og8DBnaqNt/h2PO0GHR3LgoyaUHDQ3BjSAU07PHC88o
xN5k6+DSwaGsAtmzmohkZDJczJXZ2UtDodkFRZKPXW8yYzQuOkf7EKRhE8tJjbSmQvvcl5jMXD8A
BtneH9n7D4pOHzID9sLeWzuQZRIW9zQpJAV1SxSzGpJNnEP4QAhG1JbA/T3JRVb99ihqbVR8bOpA
EAAt+BhYf4YbmN1i5cPwQ0+NCPPrGqqpak08j5TFQLCSXf/QD+N1HDC4+iSr99hqXL1OQGb6/5VF
/44hHmoeFsajl42UYVFp84GCjh1ftHe+AEUJad8qN5tLcEQqpN1ZLOn/zRdOFrRLmSiKXU5JgNq0
PORzwwfknLHrbxOs9N3JaVc3soaXPWSIhmXB07QLf/WYW6XUM8egXLzmv61HSnB4HjfWCAkaVLVo
mx/t0byMs3HB5QHQWhL4uo2lrucl55BTx1r3/+dXiqS1NtQXLqOl7evbFsFzW4sACTRdNyRPSqA3
P4g/TtM0EWLgesxxmy5p0neKSVAs0CNNbTEi3vJmJgZsvEDvrCSw37Z1LBFBm6KG5Vkxb+3Xu922
SRNuyId7Df480sM+XK/k30Ht7CYcqdx8kLYkkIVfVhw/WNL/2KJ0o5Um+64xEPfNKDusWNzNDEMt
yJiHU+i1zvYBzjFts9THRzaZa4ZrHlillHdX9x8YWzJVBC7JYPrKqhxJQ3fn2OJ1St/koGNgijv4
NAMWSGpFgllmiZOl9PoG/kNDr6IezDNWrS7DgpfgWTSrFkuxDVxL3STUHp6aZOM9v4iuMjOj14tg
BNfTBuBdBusp8RvVoSmO+xy8GYM7cKZpM7KAJysdJEXPk9Djnzf3Y/EjA6qj05E27e4/o8GijxVh
64xlfTX6mRWHW8fVB5UASt0X3v5lEMAz0lgyQW1mqR7La81z+koHYODUdBugux9sGRgIlWltffZq
bVR8bOpAEAAt+BhYf4YbyfxeGFPVLpVkOBWVQNdAsTmLbaqGdoypKWJ0hGgEqMgINg7chmMJlcHH
sBjLwYPhIju2WlR4f/M9E5tXNgZkew10W/hAgfmt8W4w7Z/ArvrONnQXKsIIMdRMoqZeED08LRUC
u8m1xMCOp3PoWGjTGe93BgiNeMS9Fx6dhxAsHxT2mCkpnJwk7PKu9UpmShRbTecxj/h/EQOUYa2Y
3TB95PQDrS1ts7d9olMSGhaCkPP46h/YYDICgoYMt+7HKwJGPAPO0Vl+3TjJHWTfG/Gjgw8Igx/5
3zCClk4HvlcC7yG0zS1MXIVay6TBnoQkQf5NSuPXUcwgupnYU2JMs8eJB0tpfELN/cUw0zF2/VZB
oFqbANFiW5Wg4aLUvwI+4DERnYfJQWNfynTmBBRGfq36GxsYdBoST4z4t6Yo/0t643R8VajYfoHz
0f1pvTt6cbbzZ+UOijf8ggSBbtGa8HRJ/ySwmD1YS4hW3H/p1u5fRU1MhSHXqsrU2TQF9h4j80qV
0GHR3LgoyaUHDQ3BjSAU07PHC88oxN5k6+DSwaGsAtkhkBlZtNPoG/UuospNEyrYRZKPXW8yYzQu
Okf7EKRhEztO7Ejn1tEMwybHxj6/SMEgP6q9yehTnN7BcP1gw3swZRIW9zQpJAV1SxSzGpJNnEP4
QAhG1JbA/T3JRVb99ihqbVR8bOpAEAAt+BhYf4YbmN1i5cPwQ0+NCPPrGqqpak08j5TFQLCSXf/Q
D+N1HDC4+iSr99hqXL1OQGb6/5VF/44hHmoeFsajl42UYVFp84GCjh1ftHe+AEUJad8qN5tLcEQq
pN1ZLOn/zRdOFrRLmSiKXU5JgNq0PORzwwfknEv8JGDq3Omu7AL3t4MtLAMBfdPV8a02+e7CmAyR
UHlfXLzmv61HSnB4HjfWCAkaVGdXp298UrVGAOv3BnIeOzb4uo2lrucl55BTx1r3/+dXwxAV2V/4
5E0XTO2PkwqPICPdlpFk534U3JzBAC3HJcwxZAk3t0V8XETqDSXy+A9jCvvKZCAB5W7tkBL9tKiM
mXwgkXLNW3zRMaUADjW+7WniJVsszEO2FICSdLiKQaCgzMCEVToS4BbaoxN9SU5n68UWr2r3duzG
mt25b7RVSV1UbN2QsXIycuc0J4PcoYe4Sxs1RE++u9M/3OBdoQcY7XyTPXfl8krW1WAfNchAcfzE
wXZCm/SUTd9XFxZAuDe5697iXg67iN5NQdlX5sd68Ao4foWozbJjP2Fu6u4aZF2Jc0R7AqaRCdNo
wP4hsw37oBoKLkDRLuAglpMZu7LHSeFydiXY0uosLIs36y8CdZZp2r6RBN2Yq4bX0UryiRBHIKyM
GjP7YwbEMaYoOpg6OtDQq5oFrPktTt3nFsYDgMovCbQvhkVsui8UQrXBKvBVD+C4acqg3CgOCGFy
FItVVIqyOCIaVeLfxOY4WwfLrCYksN+2dSwRQZuihuVZMW/tNgxU1cKZa/EFL5k6ohCjEn0xKUMq
VK/MJtpaQ3FFYe+OlUJUqgvtxcoPko7aKMnVji2RX/nkfjjqz1tNbclYMeaG0cCRJEC9iDfgbwZO
7kHSjTsRGCDS2kssG32P1c42ujIGsIBaY7CFze2pd+yaC/6tHGdR7IwS+nCDOGAAIJtGUYiJYNL3
cnxOz5loK/Ju9s6vcdWwcgoj++Mo+6rb6i6ZYe9XYHFnOJMnY6lsPeGf4G4qhVXXKLjs5AxkhlXr
sRsKUObej37UvctIrAxUVZg9lgv67CEBia/DmhcaC497c8PFvb5y8wjBezopYidBxgkXQuDPnwSH
BfKhpuIl8g48RFlbmERmNNYFf7H50aM2oQNNwiuROQAHYC4k7gn8EQwxprrvZLyhrA8IVczrpGAz
vg8YPbgSqB2LwXrQrTYCJbFs1to8lFxSoWa2ylBN4QXuHY7VktL73AUBEWVsTGq53CahiS5+uqXq
yyox0mgYcZnIojamTBJYQ1Hp6o0n6OCHk4aA9F0c7G39zRr0wHpBE1OHnXbUaIIUL1SMEwJ8Swax
0Uh1iQ8xj27Dr5aDMX1iIP3cSKV01ILrQvufytMXAglbS/RRKbvFAqnVid8V8w9YkuTnHgpnlpsE
0Vh1waF3MqlHcWlhL7IFKEhdALK3DyelMDx25fB0KGsyosrNfBJxRjD3QLNUHSUQLh9hLq/17QRn
69FSgKR77QLweSJTR9aAuQybVq/ZbTHJmqGB2OHLPu3GN3fQOy43OkksT9kWb47CmluSm353M4Fv
HeCwOPHJ38Lp/tzQtrHMiVQsjsvWE8D0lynMrN2hKksF5hMe9HS+mm5FgeyuSz2RyXSpXgRBjf9q
i/W4bK1TX90KibMw9rU+MTCGThurWJskh+Uo1kc0DKPpjtyB3LoktfKW1Ju9E2Gohm9xkiWn7M5A
GCADTUE2vDfW4HLffdMKJCV+FY4OUZIR12IQ/2o4LMEE9GTLj3BfuIPPs6WE+lC1rYtUliKE0sBb
BSC4+vwGzl6H8zWfPYBz4aTKdLykd72eMSaBRfAJFx988h4fOx65QmmWFBaAIr23REIZVDjq7Tg0
gkGWsfJ+cMZJTCTalDD3NHwdLYY9sIBZuEshkHFQTTYkY+Y6OjQKP8qAby4mUdlTIL+ZcV+5mn4K
R5Bn8yLJQCr2RiNYD0WKq/8V7RhFkKWvzWbzJHDLlXCEJEV7ByOxqk615e25+FjuErvB7tj56+0o
cQuQ1qgcMN6kXKfoCnLbRtFNVjbOj9UFL/YqoLYApBj6GJdgKiagao3krEPPAbC96g9q3Qy5FL66
76g98EHOLSPyolsT02pmrdowK0HvXndZoRRwtAVEjtVtqosY97mcjmwnk539S3DkkxjxpjqbLmFP
m3/Cuh661CN3MhedEafXvxaB4sMk0HSZJYx1vYCqMeNEah/4WhZcrRA+X/7afuf2Dv/D0wAYFmAq
ESHmKfO8b2BlpO+VqvUAuf8Nxlaq8B8nWkfteEJrgMchUbSL1xXP+qFcbqKs8tnlbUxWYPsCHC8Q
J8b4JxJBLQp7QivxXZtfCGwOj8y/WAQt38qy/qhgrEz3Uuf0vtCzhcc8qt+BeSV/GWfl7KYwfgxc
stoMrdcfQ1+6rZoa9CRpnrYH0Vt0FnrsqWpuW7IVWGQdCgGyXhgHp7bYPFudxzF9YiD93EildNSC
60L7n8qEBtfs24BmxdfL/1LTXv5zZk+mRDbRwtHQlnnSUpYLOjQRYuB6zHGbLmnSd4pJUCzQI01t
MSLe8mYmBmy8QO+sJLDftnUsEUGbooblWTFv7de73bZJE27Ih3sN/jzSwz5cr+TfQe3sJhyp3HyQ
tiSQhV9WHD9Y0v/YonSjlSb7rjEQ980oO6xY3M0MQy3ImIdT6LXO9gHOMW2z1MdHNplrhmseWKWU
d1f3HxhbMlUELslg+sqqHElDd+fY4nVK3+SgY2CKO/g0AxZIakWCWWaJ7f7slMP8RSA+LVcqhMzC
+8OCl+BZNKsWS7ENXEvdJNSFspg/0A0QTcDq3gLlxY+gvwh8LzS8yW/dhRo2GgUMimnavpEE3Zir
htfRSvKJEEddXTbIdgFtxRD40CCX1K8Gr5UkciMPyqAnUaMpEef+/y8JtC+GRWy6LxRCtcEq8FUP
4LhpyqDcKA4IYXIUi1VUirI4IhpV4t/E5jhbB8usJiSw37Z1LBFBm6KG5Vkxb+02DFTVwplr8QUv
mTqiEKMSfTEpQypUr8wm2lpDcUVh746VQlSqC+3Fyg+SjtooydWOLZFf+eR+OOrPW01tyVgx5obR
wJEkQL2IN+BvBk7uQdKNOxEYINLaSywbfY/VzjaBIugewAbE/qJXZdzenTEB/q0cZ1HsjBL6cIM4
YAAgm0ZRiIlg0vdyfE7PmWgr8m5cJ8kbFh70K8QdCPHfWFgvRZKPXW8yYzQuOkf7EKRhE2LPQX0h
YXh9Xb8qdS3MTuzFy1a0jRwIz2Way0dmaNnJZRIW9zQpJAV1SxSzGpJNnEP4QAhG1JbA/T3JRVb9
9ihqbVR8bOpAEAAt+BhYf4YbmN1i5cPwQ0+NCPPrGqqpak08j5TFQLCSXf/QD+N1HDC4+iSr99hq
XL1OQGb6/5VF/44hHmoeFsajl42UYVFp84GCjh1ftHe+AEUJad8qN5tLcEQqpN1ZLOn/zRdOFrRL
mSiKXU5JgNq0PORzwwfknAfmI36qNbqMQTjPX+O4XLFlv1KePBLsVjOfAIockzEcXLzmv61HSnB4
HjfWCAkaVIGdXXJFQVr9ZWiaaRdz0vrAnOsEGRFqTrPwdwjC8tF5J/LGv9kYAQif642GCmO4+v8S
fVUUq9+iFYpA4I8io3ikgL/6W1ObUdgAlz30XrJQh1vH1QeVAErdF97+ZRDAM9JYMkFtZqkey2vN
c/pKB2Dg1HQboLsfbBkYCJVpbX32am1UfGzqQBAALfgYWH+GG8n8XhhT1S6VZDgVlUDXQLE5i22q
hnaMqSlidIRoBKjICDYO3IZjCZXBx7AYy8GD4SI7tlpUeH/zPRObVzYGZHsNdFv4QIH5rfFuMO2f
wK76zjZ0FyrCCDHUTKKmXhA9PIWbEq8kDHTRnk2OA4YBEyfvdwYIjXjEvRcenYcQLB8UJ3ubMSLz
dBOIw8Abnho0fUdK8ul0VqU+4lwMNnAwPzQ98EHOLSPyolsT02pmrdowF5uy53eFHmB8VUUNDbN1
gDtEGoDATDWJNaNpT11vI5jxpjqbLmFPm3/Cuh661CN3MhedEafXvxaB4sMk0HSZJYx1vYCqMeNE
ah/4WhZcrRA+X/7afuf2Dv/D0wAYFmAqESHmKfO8b2BlpO+VqvUAuf8Nxlaq8B8nWkfteEJrgMch
UbSL1xXP+qFcbqKs8tnlbUxWYPsCHC8QJ8b4JxJBLQp7QivxXZtfCGwOj8y/WAQt38qy/qhgrEz3
Uuf0vtCzUk7E+XqaB7JP+bLCqj1qHQxcstoMrdcfQ1+6rZoa9CRpnrYH0Vt0FnrsqWpuW7IVsYwP
E/uqc0P916tC0xT+mzF9YiD93EildNSC60L7n8qCKoMVt24/I00Q7Bh7zzJhH8dKmt03Sj7D2Onm
3+kyoTQRYuB6zHGbLmnSd4pJUCzQI01tMSLe8mYmBmy8QO+sJLDftnUsEUGbooblWTFv7de73bZJ
E27Ih3sN/jzSwz5cr+TfQe3sJhyp3HyQtiSQhV9WHD9Y0v/YonSjlSb7rjEQ980oO6xY3M0MQy3I
mIdT6LXO9gHOMW2z1MdHNplrhmseWKWUd1f3HxhbMlUELslg+sqqHElDd+fY4nVK3+SgY2CKO/g0
AxZIakWCWWaJTPvUIIftVI/lYW6Eakfqw8OCl+BZNKsWS7ENXEvdJNScNJ+cuuw40p8ocC0WxLAG
aN/yr8ooEJmHAJ98wrfH9WnavpEE3ZirhtfRSvKJEEccP6bGeUPr3jVDH/vFdpWNCntyU93rjoQp
ke/0cXHWBC8JtC+GRWy6LxRCtcEq8FUP4LhpyqDcKA4IYXIUi1VUirI4IhpV4t/E5jhbB8usJiSw
37Z1LBFBm6KG5Vkxb+02DFTVwplr8QUvmTqiEKMSfTEpQypUr8wm2lpDcUVh746VQlSqC+3Fyg+S
jtooydWOLZFf+eR+OOrPW01tyVgx5obRwJEkQL2IN+BvBk7uQdKNOxEYINLaSywbfY/Vzjbl4zlf
vtnb6K3hRoY9Aqax/q0cZ1HsjBL6cIM4YAAgm0ZRiIlg0vdyfE7PmWgr8m4V6Gua01GOm8zJFtDO
AYw0RZKPXW8yYzQuOkf7EKRhE19sdPwPEYhuDBQs0oNgmJBgEqNGXiHjsFHC1sKTWX0tZRIW9zQp
JAV1SxSzGpJNnEP4QAhG1JbA/T3JRVb99ihqbVR8bOpAEAAt+BhYf4YbmN1i5cPwQ0+NCPPrGqqp
ak08j5TFQLCSXf/QD+N1HDC4+iSr99hqXL1OQGb6/5VF/44hHmoeFsajl42UYVFp84GCjh1ftHe+
AEUJad8qN5tLcEQqpN1ZLOn/zRdOFrRLmSiKXU5JgNq0PORzwwfknBDmQ5s25TLK1z90Rl5XiKav
gUvQH3kMJbBqFZWZT64RXLzmv61HSnB4HjfWCAkaVDQXSO9nH663icQ8kTqOP0/cEKi4cuxsCPFu
9RfUeVayO/fwogApn53ycI4qYmpar6IfhXxDWJr0yFSnm3FbQKpEFkGwWjZ6W4gDJnlzJ/4ECvvK
ZCAB5W7tkBL9tKiMmXwgkXLNW3zRMaUADjW+7WniJVsszEO2FICSdLiKQaCgzMCEVToS4BbaoxN9
SU5n68UWr2r3duzGmt25b7RVSV1UbN2QsXIycuc0J4PcoYe4Sxs1RE++u9M/3OBdoQcY7XyTPXfl
8krW1WAfNchAcfzEwXZCm/SUTd9XFxZAuDe5697iXg67iN5NQdlX5sd68IHdYfHWBHAipXN01bFc
hOyJc0R7AqaRCdNowP4hsw37g6ZmhIZ5W3aQUZQE9Fq21kuFyCxt246c+yNUsVgeSn/0A60tbbO3
faJTEhoWgpDzTmR79Q0TT3HZtRKrRHycaWc4YdpSAHfC1qqsh2ydhAwPCIMf+d8wgpZOB75XAu8h
tM0tTFyFWsukwZ6EJEH+TUrj11HMILqZ2FNiTLPHiQdLaXxCzf3FMNMxdv1WQaBamwDRYluVoOGi
1L8CPuAxEZ2HyUFjX8p05gQURn6t+hsbGHQaEk+M+LemKP9LeuN0fFWo2H6B89H9ab07enG282fl
Doo3/IIEgW7RmvB0Sf8ksJg9WEuIVtx/6dbuX0VNxUCbr7lgL/UeAUUFUPd9d9Bh0dy4KMmlBw0N
wY0gFNOzxwvPKMTeZOvg0sGhrALZT/BYhkdg0wsW78loXUM8dWQsUpI6ahdFu71ndWwCU4A03pbB
R7Rb+xmyr5u37t3asHBGspdQJb6YT1LUKXpr6zQRYuB6zHGbLmnSd4pJUCzQI01tMSLe8mYmBmy8
QO+sJLDftnUsEUGbooblWTFv7de73bZJE27Ih3sN/jzSwz5cr+TfQe3sJhyp3HyQtiSQhV9WHD9Y
0v/YonSjlSb7rjEQ980oO6xY3M0MQy3ImIdT6LXO9gHOMW2z1MdHNplrhmseWKWUd1f3HxhbMlUE
Lslg+sqqHElDd+fY4nVK3+SgY2CKO/g0AxZIakWCWWaJGYpwWvlAJYNqII6I2w8OpMOCl+BZNKsW
S7ENXEvdJNScNJ+cuuw40p8ocC0WxLAG2H1PO6tRCwqBzQFApmE3fWnavpEE3ZirhtfRSvKJEEex
Vaa6uoyzJv53fctX/Gq5MGbC9d68oHaju9pi3vQdwS8JtC+GRWy6LxRCtcEq8FUP4LhpyqDcKA4I
YXIUi1VUirI4IhpV4t/E5jhbB8usJiSw37Z1LBFBm6KG5Vkxb+02DFTVwplr8QUvmTqiEKMSfTEp
QypUr8wm2lpDcUVh746VQlSqC+3Fyg+SjtooydWOLZFf+eR+OOrPW01tyVgx5obRwJEkQL2IN+Bv
Bk7uQdKNOxEYINLaSywbfY/VzjZwHaws2keEeGazXvwpIqUA/q0cZ1HsjBL6cIM4YAAgm0ZRiIlg
0vdyfE7PmWgr8m6oloUFlzENRsKckrSBSiQtRZKPXW8yYzQuOkf7EKRhE0n/a0F3cy7YeRnoxPRE
IziYRQpQ542j1BRYvN7k8nxfZRIW9zQpJAV1SxSzGpJNnEP4QAhG1JbA/T3JRVb99ihqbVR8bOpA
EAAt+BhYf4YbmN1i5cPwQ0+NCPPrGqqpak08j5TFQLCSXf/QD+N1HDC4+iSr99hqXL1OQGb6/5VF
/44hHmoeFsajl42UYVFp84GCjh1ftHe+AEUJad8qN5tLcEQqpN1ZLOn/zRdOFrRLmSiKXU5JgNq0
PORzwwfknLLRNolkSSSO75vjAMxLF9/SBzbE2GF2aI7vlAk6ZqxkHN+LeBfx5IKzXNqNlvRa7xwQ
KGXV5sqGJNYN8y3FHJ6kXtt/6oNLrlqg9xdSEARU5xnHS1XDGr+oAo471Q6pg1f+RQyA64oNvk1v
HeLUzOo/kDVMkIghXpCYiy9JPSEymD2WC/rsIQGJr8OaFxoLjzqAUmSZN1yjLF/8Bu/JS8PGCRdC
4M+fBIcF8qGm4iXyDjxEWVuYRGY01gV/sfnRozahA03CK5E5AAdgLiTuCfzMwIRVOhLgFtqjE31J
TmfrYDO+Dxg9uBKoHYvBetCtNgIlsWzW2jyUXFKhZrbKUE3hBe4djtWS0vvcBQERZWxMarncJqGJ
Ln66perLKjHSaJqyLsTGxtsgJZXjBl/AlLIgDN59qU3sIzPR+in7NWS3ipz8U73arBo+fk88uoOx
4T2rFNeQDUp540V1wOpFhLadxcdn7sjMQPCnHoByWMZqQlKcm0K8YogBh2fmSG0A8Jxv7W/YSTaV
pTKFWuaknuPrKK9Vw7iUds7OlYA5j2U05qkGvy8h1SZV/A509KCaWIqyOCIaVeLfxOY4WwfLrCYk
sN+2dSwRQZuihuVZMW/tNgxU1cKZa/EFL5k6ohCjEk08j5TFQLCSXf/QD+N1HDCOlUJUqgvtxcoP
ko7aKMnVji2RX/nkfjjqz1tNbclYMeaG0cCRJEC9iDfgbwZO7kFXL7Xgt+o7F939cYU5D46qF3R6
bplc7aWgviwCVofqf0ZRiIlg0vdyfE7PmWgr8m5cC1o/QG//xElBAjuEBQfkiyVN5wWQRkiEDF/y
hsxJEXbeH9Rx5E/4YcxkUV5CEE2NfaAQwTYfv4l2dlUo066y1rbXfqN6fgkbqIJ+vyA5214fH/As
/ZcFHSqzM7AKOyN8IJFyzVt80TGlAA41vu1p4iVbLMxDthSAknS4ikGgoMzAhFU6EuAW2qMTfUlO
Z+sNHlOX2qe0vUq94/3HgBqxxdT/8WWU6fVOVtQdT5SHXUsbNURPvrvTP9zgXaEHGO18kz135fJK
1tVgHzXIQHH8xMF2Qpv0lE3fVxcWQLg3uQTMQsWSZ85Ps255m3yrBP3PLPkEVcAwuDW4MMiXLw+4
0IKwbpfufQUNwNcePtFblqGQI1ovemvbDnUEqbjzOAu5GBt92Ky0M0Ve+VATKOHTaShHlLZc6sGU
u09isdt9Uwa9QFGF0BgUG1EC22i5DjxAY/edPIIMJo+F3yTacMPT3zJEsii87SWiTc2JWxIzLLH3
VPGXEmMz8Ev0kNFESQKbXTVL1eSgI4h+dVZ/yy9tNDt1sDFW0mP7NJfSVDAExbtWO4LB+ZxB1mJt
wZlIvWoKB8RxfCAkk1Blp/+pcfDeW/RxrTSx4aX2Qs/inhBDcZAtDOVRXVQn5f1VTnLTgbnY1DFy
RPiJRRjEjFxn3jYcuMqJktTFxohP3etHFhVaqwnZThcOaKfPp/wF8Ox7aPNS+YUwMjqLhGlXneTC
ZBkPOI14+5Gm4gH73NFn6evLx00tWt1YFZbIvUOmFIDZ36Q0wNLTmHdvz6If7Mo3gn19ZE/NT968
y4rklVY4douBRA8Igx/53zCClk4HvlcC7yGf+ZV2shEbOrlivStZaGpnSuPXUcwgupnYU2JMs8eJ
B0tpfELN/cUw0zF2/VZBoFqbANFiW5Wg4aLUvwI+4DER9oq6dgKcB2bfNk008n99TRsYdBoST4z4
t6Yo/0t643R8VajYfoHz0f1pvTt6cbbzZ+UOijf8ggSBbtGa8HRJ/8sc+lNifIFTnvrzW+AVhsbT
A4EKLx3/qpTjhJU62Zzus8cLzyjE3mTr4NLBoawC2XMCPm4EcR2E0rMx2KDQq3Aw3S8PNbSOox5z
LFDBzppxyebPjecI/OBRmiVX7uC+lz4dDWdhOlqR/YtlTulN6L5DyUMbGePC35PNciOhLnBq6AkL
3uBJRo+6PySW6O+UyOA6zjv1ikO13tcwQUXo1716JRZylKvuD2WzsHYT0cAtsfdU8ZcSYzPwS/SQ
0URJAq0ijXiMGyjoi8giiFNvGWPjBj63iDy7LpWSBTuF8+UX/I5nNU16AY8Mva36x6BW+j2JTrVt
CuD9fqEHE2s0Qw3uFa9t4+C63jO+ATH5iEwYlnJWkbDXt0ERnt2tjaFuMsuEriHBgRXiogQSWXch
586Jt9lwTMKelfSv+nFHoMGUa3jFOoyFN1mQ+guMaEaO0E7VruMHbwFDIGneVNdJ6Zz2E8CU9ji1
k82kj8vmeDgHzpX3Xo71j92+BhvoMnlI5zQRYuB6zHGbLmnSd4pJUCyxQvv3MFlYuTY0orLWwFwB
JLDftnUsEUGbooblWTFv7de73bZJE27Ih3sN/jzSwz5cr+TfQe3sJhyp3HyQtiSQ+JAjdNFMuf2C
867YhRkKiTEQ980oO6xY3M0MQy3ImIdT6LXO9gHOMW2z1MdHNplrhmseWKWUd1f3HxhbMlUELslg
+sqqHElDd+fY4nVK3+QNBEvKQk/SsFS/c1RIJiKX/UEsBZ927XE13XicSqf3GyOCfz5sODBo5nM9
rvEMK98610t5pKDSX4byqJ0nXvd/NbkwWoPxA2RBlXIrXuB0vMjc3rQzgFPLCeng6MmeIXYEJsll
gsmV/nQAnKvh2YWDmD2WC/rsIQGJr8OaFxoLjzqAUmSZN1yjLF/8Bu/JS8PGCRdC4M+fBIcF8qGm
4iXyDjxEWVuYRGY01gV/sfnRozahA03CK5E5AAdgLiTuCfzMwIRVOhLgFtqjE31JTmfrYDO+Dxg9
uBKoHYvBetCtNgIlsWzW2jyUXFKhZrbKUE3hBe4djtWS0vvcBQERZWxMarncJqGJLn66perLKjHS
aJqyLsTGxtsgJZXjBl/AlLIgDN59qU3sIzPR+in7NWS3ipz8U73arBo+fk88uoOx4T2rFNeQDUp5
40V1wOpFhLYUtPNLpEkraIOELSknHP+c351n5hlXh9m7kmw5iBOXg82O9FAP6mGKuQesT47H7tnN
Yur3K4vStMW93spNdpwoNg7PvalAVCO+++NbP8bv5nXII4o5u9SXDEa1jmQnef3NfBJxRjD3QLNU
HSUQLh9h9AwzyszmNqatz0ivdeo4aDQ7dbAxVtJj+zSX0lQwBMU3SgWWsiMXLTOvOHYtHOFMs4/u
Ezcrp0+6J1aKZm1N00o34Il8A/WZZtaQPstqsxFLRrpWmqS4sDUDyuDxb/OrELHNCS2RP+qX35rx
yLnadtVJ1Lp9XOsbQJvJd8gUF9Eq+XnQ2QmetGVaNodVteKrShhJDz6pf8qONhH8IDJR07swRYr6
n2TSFKw2q6cI1/zFFFE5jqT6fsG49IRA22VRW7Yy++CxWJ6Dcq0/55QPWMVzEf9rIDRMQ5KJXN1e
PB7SWDJBbWapHstrzXP6Sgdg4NR0G6C7H2wZGAiVaW199mptVHxs6kAQAC34GFh/hhvJ/F4YU9Uu
lWQ4FZVA10CxVwWf82BRuDcPlvgMeIWbpAg2DtyGYwmVwcewGMvBg+EiO7ZaVHh/8z0Tm1c2BmR7
DXRb+ECB+a3xbjDtn8Cu+i25XA7X70OPGgDdoa1pZ3mUoyKP8miOHYkjkfcZjy1mItX5DJSlh945
Pw+aCEjSXuIQDF9ciGi8+OC/6Nuw8X/Ihh0TgSLaO1/UnQnchCQdXP+hU4e1gOTT7uqWGgc6UZoO
/WkEM+oDEe81w/Oq+gw0EWLgesxxmy5p0neKSVAssUL79zBZWLk2NKKy1sBcASSw37Z1LBFBm6KG
5Vkxb+3Xu922SRNuyId7Df480sM+XK/k30Ht7CYcqdx8kLYkkPiQI3TRTLn9gvOu2IUZCokxEPfN
KDusWNzNDEMtyJiHU+i1zvYBzjFts9THRzaZa4ZrHlillHdX9x8YWzJVBC7JYPrKqhxJQ3fn2OJ1
St/kDQRLykJP0rBUv3NUSCYil/1BLAWfdu1xNd14nEqn9xsjgn8+bDgwaOZzPa7xDCvfOtdLeaSg
0l+G8qidJ173f+mLUNvNYEq3ib1uaR0gPLJxqOmmIF44oA/oiVbgCLy7EnDhspNMMq238yKA5NxH
E5g9lgv67CEBia/DmhcaC486gFJkmTdcoyxf/AbvyUvDxgkXQuDPnwSHBfKhpuIl8g48RFlbmERm
NNYFf7H50aM2oQNNwiuROQAHYC4k7gn8zMCEVToS4BbaoxN9SU5n62Azvg8YPbgSqB2LwXrQrTYC
JbFs1to8lFxSoWa2ylBN4QXuHY7VktL73AUBEWVsTGq53CahiS5+uqXqyyox0miasi7ExsbbICWV
4wZfwJSyIAzefalN7CMz0fop+zVkt4qc/FO92qwaPn5PPLqDseE9qxTXkA1KeeNFdcDqRYS2XucT
r/9Oh3RPrlYXXDWvrgdP+vzMJ4HLmtBjmrtLjuJ+IGRliiwovQPbhTCpXpzi6yivVcO4lHbOzpWA
OY9lNOapBr8vIdUmVfwOdPSgmliKsjgiGlXi38TmOFsHy6wmJLDftnUsEUGbooblWTFv7TYMVNXC
mWvxBS+ZOqIQoxJNPI+UxUCwkl3/0A/jdRwwjpVCVKoL7cXKD5KO2ijJ1Y4tkV/55H446s9bTW3J
WDHmhtHAkSRAvYg34G8GTu5BVy+14LfqOxfd/XGFOQ+Oqhd0em6ZXO2loL4sAlaH6n9GUYiJYNL3
cnxOz5loK/JuXAtaP0Bv/8RJQQI7hAUH5IslTecFkEZIhAxf8obMSRFYGCAlaUXMJvOHK9WBaGL9
fR+8Wb+qVHwzPI5tsucSDnY8vUdT3Gw3SyoPAG0DPrXFcxH/ayA0TEOSiVzdXjwe0lgyQW1mqR7L
a81z+koHYODUdBugux9sGRgIlWltffZqbVR8bOpAEAAt+BhYf4YbyfxeGFPVLpVkOBWVQNdAsVcF
n/NgUbg3D5b4DHiFm6QINg7chmMJlcHHsBjLwYPhIju2WlR4f/M9E5tXNgZkew10W/hAgfmt8W4w
7Z/ArvotuVwO1+9DjxoA3aGtaWd5lKMij/Jojh2JI5H3GY8tZiLV+QyUpYfeOT8PmghI0l7iEAxf
XIhovPjgv+jbsPF/yIYdE4Ei2jtf1J0J3IQkHU3u3P1T9zbSlwDwAKtptWwMQt3SalX6WXw7nMAO
9NyTNBFi4HrMcZsuadJ3iklQLLFC+/cwWVi5NjSistbAXAEksN+2dSwRQZuihuVZMW/t17vdtkkT
bsiHew3+PNLDPlyv5N9B7ewmHKncfJC2JJD4kCN00Uy5/YLzrtiFGQqJMRD3zSg7rFjczQxDLciY
h1Potc72Ac4xbbPUx0c2mWuGax5YpZR3V/cfGFsyVQQuyWD6yqocSUN359jidUrf5A0ES8pCT9Kw
VL9zVEgmIpf9QSwFn3btcTXdeJxKp/cbI4J/Pmw4MGjmcz2u8Qwr3zrXS3mkoNJfhvKonSde9381
uTBag/EDZEGVcite4HS8yNzetDOAU8sJ6eDoyZ4hdno+z4rPMKVoK4N9iESuM8aYPZYL+uwhAYmv
w5oXGguPOoBSZJk3XKMsX/wG78lLw8YJF0Lgz58EhwXyoabiJfIOPERZW5hEZjTWBX+x+dGjNqED
TcIrkTkAB2AuJO4J/MzAhFU6EuAW2qMTfUlOZ+tgM74PGD24Eqgdi8F60K02AiWxbNbaPJRcUqFm
tspQTeEF7h2O1ZLS+9wFARFlbExqudwmoYkufrql6ssqMdJomrIuxMbG2yAlleMGX8CUsiAM3n2p
TewjM9H6Kfs1ZLeKnPxTvdqsGj5+Tzy6g7HhPasU15ANSnnjRXXA6kWEtp3Fx2fuyMxA8KcegHJY
xmr2saJ98Pl5tVOY063JcXomtH4NDbIbCEgV0G0mEkb4ic1i6vcri9K0xb3eyk12nCg2Ds+9qUBU
I77741s/xu/mdcgjijm71JcMRrWOZCd5/c18EnFGMPdAs1QdJRAuH2H0DDPKzOY2pq3PSK916jho
NDt1sDFW0mP7NJfSVDAExTdKBZayIxctM684di0c4Uyzj+4TNyunT7onVopmbU3TSjfgiXwD9Zlm
1pA+y2qzEUtGulaapLiwNQPK4PFv86sQsc0JLZE/6pffmvHIudp21UnUun1c6xtAm8l3yBQX0Sr5
edDZCZ60ZVo2h1W14qtKGEkPPql/yo42EfwgMlHTuzBFivqfZNIUrDarpwjX/KlqZjcag5rs5Fq0
b1xwpNjN0nzQwEU9qSPT8WqCTaOMxXMR/2sgNExDkolc3V48HtJYMkFtZqkey2vNc/pKB2Dg1HQb
oLsfbBkYCJVpbX32am1UfGzqQBAALfgYWH+GG8n8XhhT1S6VZDgVlUDXQLFXBZ/zYFG4Nw+W+Ax4
hZukCDYO3IZjCZXBx7AYy8GD4SI7tlpUeH/zPRObVzYGZHsNdFv4QIH5rfFuMO2fwK76LblcDtfv
Q48aAN2hrWlneZSjIo/yaI4diSOR9xmPLWYi1fkMlKWH3jk/D5oISNJe4hAMX1yIaLz44L/o27Dx
f8iGHROBIto7X9SdCdyEJB3h2QSQULnymHUFQlZdJJKVn2LPhYm3enLZiM1AzayXJtJ5SvKf+gB1
XEZZGQxeIVSDCasPo1a8MG7cuc9F2wqD7Tg0gkGWsfJ+cMZJTCTalHkoThOHTUzoamA8yUR5Mqn2
irp2ApwHZt82TTTyf31NC9fFKb3B9YKv7wNzXcBvO1KGQxy2OrX4ez9KJVI7MSozUoNPr9Mpj2aD
ceWk4wXMAcac5M1U+ATJ9PmxZ2+6KT1kkTfnW8SViO7ABVsZ46BV/3RcLcZ7OpzVaRLurjX/HN+L
eBfx5IKzXNqNlvRa7xwQKGXV5sqGJNYN8y3FHJ6kXtt/6oNLrlqg9xdSEARU5xnHS1XDGr+oAo47
1Q6pg3Dt+DYkrjEio8W425S5GeeeC7xsADL5ywODon3Wg/vXmD2WC/rsIQGJr8OaFxoLjzqAUmSZ
N1yjLF/8Bu/JS8PGCRdC4M+fBIcF8qGm4iXyDjxEWVuYRGY01gV/sfnRozahA03CK5E5AAdgLiTu
CfzMwIRVOhLgFtqjE31JTmfrYDO+Dxg9uBKoHYvBetCtNgIlsWzW2jyUXFKhZrbKUE3hBe4djtWS
0vvcBQERZWxMarncJqGJLn66perLKjHSaJqyLsTGxtsgJZXjBl/AlLIgDN59qU3sIzPR+in7NWS3
ipz8U73arBo+fk88uoOx4T2rFNeQDUp540V1wOpFhLbnX+TUebLxqSE3wlSiNn8X5CMs20y4yQP2
3jN5D3SGFkmE2qieCiK974RJ5xJBgdDrKK9Vw7iUds7OlYA5j2U05qkGvy8h1SZV/A509KCaWIqy
OCIaVeLfxOY4WwfLrCYksN+2dSwRQZuihuVZMW/tNgxU1cKZa/EFL5k6ohCjEk08j5TFQLCSXf/Q
D+N1HDCOlUJUqgvtxcoPko7aKMnVji2RX/nkfjjqz1tNbclYMeaG0cCRJEC9iDfgbwZO7kFXL7Xg
t+o7F939cYU5D46qF3R6bplc7aWgviwCVofqf0ZRiIlg0vdyfE7PmWgr8m5cC1o/QG//xElBAjuE
BQfkiyVN5wWQRkiEDF/yhsxJESAZA5k0i5RX0mFnxSE4+/gzKplhRPCwop3AGqTH35hq/UxtE/Ne
2VTaQMQD2CX79E8PE0giEabzLsllfPMz/mVqsG+Q75nhk6bw4/sj6RzwdHTUKtYW6/ZFHPRsY6wy
8cYJF0Lgz58EhwXyoabiJfJuXVY7B10q7qWssDppN5TkstvOAnPIWKVJBoUQzcFuDBzSbKn2TA23
2Uw0QNVujmSc0qWOC7MkX7OPZyf0fs+tjv1ill/odmFB8uaa98/C5BUPzLDFwotZ/82GxooDyWLp
tQs1Hio17qVON+QqeisqHgEAA3EUqGkgK3fC71JIfvJWnLz1mj7dWdWqUHkKhDz/RfcTemLSC4eb
3YagFEsFq65foefJTDKRuh5+fgzlYvw/cKjPM9UXMvHog9FB5blAY/edPIIMJo+F3yTacMPT3zJE
sii87SWiTc2JWxIzLLH3VPGXEmMz8Ev0kNFESQKbXTVL1eSgI4h+dVZ/yy9tNDt1sDFW0mP7NJfS
VDAExbtWO4LB+ZxB1mJtwZlIvWoKB8RxfCAkk1Blp/+pcfDeW/RxrTSx4aX2Qs/inhBDcZAtDOVR
XVQn5f1VTnLTgbnY1DFyRPiJRRjEjFxn3jYcuMqJktTFxohP3etHFhVaqwnZThcOaKfPp/wF8Ox7
aPNS+YUwMjqLhGlXneTCZBkPOI14+5Gm4gH73NFn6evLxwM3xu0PoxZI7AUiH9xuhj0ZidwT1y8g
eRdKkHmGFEftT6W9+RlxRUWevVi4yLjdJA8Igx/53zCClk4HvlcC7yGf+ZV2shEbOrlivStZaGpn
SuPXUcwgupnYU2JMs8eJB0tpfELN/cUw0zF2/VZBoFqbANFiW5Wg4aLUvwI+4DER9oq6dgKcB2bf
Nk008n99TRsYdBoST4z4t6Yo/0t643R8VajYfoHz0f1pvTt6cbbzZ+UOijf8ggSBbtGa8HRJ/8sc
+lNifIFTnvrzW+AVhsbTA4EKLx3/qpTjhJU62Zzus8cLzyjE3mTr4NLBoawC2XMCPm4EcR2E0rMx
2KDQq3Aw3S8PNbSOox5zLFDBzppxbSdgULDshutbj5u+Oy4tLbpNAY4UbQ6SdCheU5bAEKMkfC0c
1u5ARWB6D2G8cjmh6AkL3uBJRo+6PySW6O+UyOA6zjv1ikO13tcwQUXo1716JRZylKvuD2WzsHYT
0cAtsfdU8ZcSYzPwS/SQ0URJAq0ijXiMGyjoi8giiFNvGWPjBj63iDy7LpWSBTuF8+UX/I5nNU16
AY8Mva36x6BW+j2JTrVtCuD9fqEHE2s0Qw3uFa9t4+C63jO+ATH5iEwYlnJWkbDXt0ERnt2tjaFu
MsuEriHBgRXiogQSWXch586Jt9lwTMKelfSv+nFHoMGUa3jFOoyFN1mQ+guMaEaO0E7VruMHbwFD
IGneVNdJ6Zz90xeJJMFOUIQRNPKT9V8fVwu9V64Luv7Bz/preh5+EfblzghMMrQ5Yjw3B+RNayAS
ZYAwCdYnJqWk3qlCHH7ezXwScUYw90CzVB0lEC4fYS6v9e0EZ+vRUoCke+0C8HkiU0fWgLkMm1av
2W0xyZqhx5n3LDY2viKCvzage/wEPdaCrgaMPeVYNOaD2hGWSS3gsDjxyd/C6f7c0LaxzIlULI7L
1hPA9JcpzKzdoSpLBeYTHvR0vppuRYHsrks9kclZQ/n2+ng1ASubZyrzgsxDKTRAmsVbYA+3YuVl
FJppWsvRDNE1pPWVGqf6OxRJ4oAk3ACeW6Isy2nUInKhKT6ypP2QeWY0ewd0i1jBsWXJcBVsq7wx
9BQX/LQPIBEd6CfqBQKORIiq0FiW2ick3n7XZRIW9zQpJAV1SxSzGpJNnFhgTx2bUCYihh6ws6Ia
nHBqbVR8bOpAEAAt+BhYf4YbmN1i5cPwQ0+NCPPrGqqpak08j5TFQLCSXf/QD+N1HDBQfbjDr33Q
p0oxmrUMLp+6/44hHmoeFsajl42UYVFp84GCjh1ftHe+AEUJad8qN5tLcEQqpN1ZLOn/zRdOFrRL
mSiKXU5JgNq0PORzwwfknJ4RcFfGyxyQoKalGqakHkFqB114zkE0pU4Exx0azL7KiMD34opaNDud
NDAYHiqah34xEXopKgocKGXGzx3pSt6gQC2xkRjALYV6bquFwyZ23TUkxNK5LmIS65qnR4tJqK0S
fqilQlo1w5YTzAK+KfPNYur3K4vStMW93spNdpwoNg7PvalAVCO+++NbP8bv5nXII4o5u9SXDEa1
jmQnef3NfBJxRjD3QLNUHSUQLh9h9AwzyszmNqatz0ivdeo4aDQ7dbAxVtJj+zSX0lQwBMU3SgWW
siMXLTOvOHYtHOFMs4/uEzcrp0+6J1aKZm1N00o34Il8A/WZZtaQPstqsxFLRrpWmqS4sDUDyuDx
b/OrELHNCS2RP+qX35rxyLnadtVJ1Lp9XOsbQJvJd8gUF9Eq+XnQ2QmetGVaNodVteKrShhJDz6p
f8qONhH8IDJR07swRYr6n2TSFKw2q6cI1/wJwNFolMducTJ8YXNIinyukK2VRVg3ZovfEOy6/6km
jcVzEf9rIDRMQ5KJXN1ePB7SWDJBbWapHstrzXP6Sgdg4NR0G6C7H2wZGAiVaW199mptVHxs6kAQ
AC34GFh/hhvJ/F4YU9UulWQ4FZVA10CxVwWf82BRuDcPlvgMeIWbpAg2DtyGYwmVwcewGMvBg+Ei
O7ZaVHh/8z0Tm1c2BmR7DXRb+ECB+a3xbjDtn8Cu+i25XA7X70OPGgDdoa1pZ3mUoyKP8miOHYkj
kfcZjy1mItX5DJSlh945Pw+aCEjSXuIQDF9ciGi8+OC/6Nuw8X/Ihh0TgSLaO1/UnQnchCQdTe7c
/VP3NtKXAPAAq2m1bNDJedWweyKo9nHmEmPjGWAOBm7fqRcTryxpz35lSsJsEmWAMAnWJyalpN6p
Qhx+3s18EnFGMPdAs1QdJRAuH2Eur/XtBGfr0VKApHvtAvB5IlNH1oC5DJtWr9ltMcmaoceZ9yw2
Nr4igr82oHv8BD3Wgq4GjD3lWDTmg9oRlkkt4LA48cnfwun+3NC2scyJVCyOy9YTwPSXKcys3aEq
SwXmEx70dL6abkWB7K5LPZHJWUP59vp4NQErm2cq84LMQyk0QJrFW2APt2LlZRSaaVrL0QzRNaT1
lRqn+jsUSeKAJNwAnluiLMtp1CJyoSk+sqT9kHlmNHsHdItYwbFlyXBco3V0KzXMlHOeiONt3G8V
Wkjyn4suEQW8OqGeNlGL2kBj9508ggwmj4XfJNpww9PfMkSyKLztJaJNzYlbEjMssfdU8ZcSYzPw
S/SQ0URJAptdNUvV5KAjiH51Vn/LL200O3WwMVbSY/s0l9JUMATFu1Y7gsH5nEHWYm3BmUi9agoH
xHF8ICSTUGWn/6lx8N5b9HGtNLHhpfZCz+KeEENxkC0M5VFdVCfl/VVOctOBudjUMXJE+IlFGMSM
XGfeNhy4yomS1MXGiE/d60cWFVqrCdlOFw5op8+n/AXw7Hto81L5hTAyOouEaVed5MJkGQ84jXj7
kabiAfvc0Wfp68vHFd3RGU+lHC6sN50b3W6tWKtoAbJvD6AcLpWWi2c8G3poHcM1N4wE8BM3IGQs
UHxXDwiDH/nfMIKWTge+VwLvIZ/5lXayERs6uWK9K1loamdK49dRzCC6mdhTYkyzx4kHS2l8Qs39
xTDTMXb9VkGgWpsA0WJblaDhotS/Aj7gMRH2irp2ApwHZt82TTTyf31NGxh0GhJPjPi3pij/S3rj
dHxVqNh+gfPR/Wm9O3pxtvNn5Q6KN/yCBIFu0ZrwdEn/yxz6U2J8gVOe+vNb4BWGxtMDgQovHf+q
lOOElTrZnO6zxwvPKMTeZOvg0sGhrALZcwI+bgRxHYTSszHYoNCrcDDdLw81tI6jHnMsUMHOmnHJ
5s+N5wj84FGaJVfu4L6XFtOc/KvBQ0Mw0QPLGPqqzAIMrigshH67I4lMV8yjnlvoCQve4ElGj7o/
JJbo75TI4DrOO/WKQ7Xe1zBBRejXvXolFnKUq+4PZbOwdhPRwC2x91TxlxJjM/BL9JDRREkCrSKN
eIwbKOiLyCKIU28ZY+MGPreIPLsulZIFO4Xz5Rf8jmc1TXoBjwy9rfrHoFb6PYlOtW0K4P1+oQcT
azRDDe4Vr23j4LreM74BMfmITBiWclaRsNe3QRGe3a2NoW4yy4SuIcGBFeKiBBJZdyHnzom32XBM
wp6V9K/6cUegwZRreMU6jIU3WZD6C4xoRo7QTtWu4wdvAUMgad5U10npnAkiSDtv7w7/Ibm8TkI6
P2lx0n34V/+xe4sqR91ItmxAhRcRffCjhfVCIHdnSa0Fx14fH/As/ZcFHSqzM7AKOyN8IJFyzVt8
0TGlAA41vu1p4iVbLMxDthSAknS4ikGgoMzAhFU6EuAW2qMTfUlOZ+sNHlOX2qe0vUq94/3HgBqx
xdT/8WWU6fVOVtQdT5SHXUsbNURPvrvTP9zgXaEHGO18kz135fJK1tVgHzXIQHH8xMF2Qpv0lE3f
VxcWQLg3uQTMQsWSZ85Ps255m3yrBP3PLPkEVcAwuDW4MMiXLw+40IKwbpfufQUNwNcePtFblqGQ
I1ovemvbDnUEqbjzOAu5GBt92Ky0M0Ve+VATKOHTr7RHGy5jDKIIDWJZWm13TH8qKcLU4RDWxMPe
lG3b+RZAY/edPIIMJo+F3yTacMPT3zJEsii87SWiTc2JWxIzLLH3VPGXEmMz8Ev0kNFESQKbXTVL
1eSgI4h+dVZ/yy9tNDt1sDFW0mP7NJfSVDAExbtWO4LB+ZxB1mJtwZlIvWoKB8RxfCAkk1Blp/+p
cfDeW/RxrTSx4aX2Qs/inhBDcZAtDOVRXVQn5f1VTnLTgbnY1DFyRPiJRRjEjFxn3jYcuMqJktTF
xohP3etHFhVaqwnZThcOaKfPp/wF8Ox7aPNS+YUwMjqLhGlXneTCZBkPOI14+5Gm4gH73NFn6evL
xwM3xu0PoxZI7AUiH9xuhj0ZidwT1y8geRdKkHmGFEftxTEAt1pqVwIFcrviWSz2wPGmOpsuYU+b
f8K6HrrUI3e4wpJCjDaJQJc5jOT5HXUDjHW9gKox40RqH/haFlytED5f/tp+5/YO/8PTABgWYCoR
IeYp87xvYGWk75Wq9QC5XK/k30Ht7CYcqdx8kLYkkCFRtIvXFc/6oVxuoqzy2eVtTFZg+wIcLxAn
xvgnEkEtCntCK/Fdm18IbA6PzL9YBIoxcH9ki0q6IYSJ5Vd2QyuzFHWmX4ejQrC1I2kjZEdUaZ62
B9FbdBZ67KlqbluyFfloVYav8upqELVpbWT3loWGm0CyFVg65/g8mkDZAxZGho+uHIRdaJ0l8P6Y
X2MZoiEQ7jZ9/FRzaSUMr/FrzcISnOsWE6SXJMugKrPmfjE+6AkL3uBJRo+6PySW6O+UyOA6zjv1
ikO13tcwQUXo1716JRZylKvuD2WzsHYT0cAtsfdU8ZcSYzPwS/SQ0URJAq0ijXiMGyjoi8giiFNv
GWPjBj63iDy7LpWSBTuF8+UX/I5nNU16AY8Mva36x6BW+j2JTrVtCuD9fqEHE2s0Qw3uFa9t4+C6
3jO+ATH5iEwY8us9lVm7XGynfOxNHadhV7A4XRkfsybftlWVTpzWvZI=
