# Supplementary material for: Entrepreneurship Resilience: Can Psychological Traits of Entrepreneurial Intention Support Overcoming Entrepreneurial Failure?
Source: Front Psychol. 2021 Sep 14;12:707803. doi: 10.3389/fpsyg.2021.707803 (PMC8476748; doi:10.3389/fpsyg.2021.707803)
Supplement: Supplementary file 1 [file Data_Sheet_1.ZIP › Resiliance and Failure of Entreprenuership/Resiliance and Failure of Entreprenuership.splsm.meta]

<ModelFileSettings>
   <settings.general locked="false" currentModelName="Resiliance and Failure of Entreprenuership.splsm" multigroupCalculationPossible="true"/>
   <settings.data locked="false" algorithm="NONE" convergenceLevel="0" skipCompleteDataset="false" modelName="null"/>
   <settings.algorithm.pls locked="false" innerModelDecoratorId="INNER_MODEL_DECORATOR_PATH_COEFFICIENTS" outerModelDecoratorId="OUTER_MODEL_DECORATOR_WEIGHT_AND_LOADING" constructDecoratorId="CONSTRUCT_DECORATOR_R_SQUARE" pathWeighting="NONE" weightingScheme="PATH" dataMetric="DATA_METRIC_1" maxIterations="300" stopCriterion="7" useLohmoellerMissingValueStyle="false">
      <initialWeights class="java.util.ArrayList">
         <initialWeight mv="CEE1" lv="CEE" weight="1.0"/>
         <initialWeight mv="CEE2" lv="CEE" weight="1.0"/>
         <initialWeight mv="CEE3" lv="CEE" weight="1.0"/>
         <initialWeight mv="CEE4" lv="CEE" weight="1.0"/>
         <initialWeight mv="CEE5" lv="CEE" weight="1.0"/>
         <initialWeight mv="ESE1" lv="ESE" weight="1.0"/>
         <initialWeight mv="ESE2" lv="ESE" weight="1.0"/>
         <initialWeight mv="ESE3" lv="ESE" weight="1.0"/>
         <initialWeight mv="ESE4" lv="ESE" weight="1.0"/>
         <initialWeight mv="ESE5" lv="ESE" weight="1.0"/>
         <initialWeight mv="ILC1" lv="ILC" weight="1.0"/>
         <initialWeight mv="ILC2" lv="ILC" weight="1.0"/>
         <initialWeight mv="ILC3" lv="ILC" weight="1.0"/>
         <initialWeight mv="ILC4" lv="ILC" weight="1.0"/>
         <initialWeight mv="ILC5" lv="ILC" weight="1.0"/>
         <initialWeight mv="NOR2" lv="NOR" weight="1.0"/>
         <initialWeight mv="NOR3" lv="NOR" weight="1.0"/>
         <initialWeight mv="NOR4" lv="NOR" weight="1.0"/>
         <initialWeight mv="NOR5" lv="NOR" weight="1.0"/>
         <initialWeight mv="PLF1" lv="PLF" weight="1.0"/>
         <initialWeight mv="PLF2" lv="PLF" weight="1.0"/>
         <initialWeight mv="PLF3" lv="PLF" weight="1.0"/>
         <initialWeight mv="PLF4" lv="PLF" weight="1.0"/>
         <initialWeight mv="PLF5" lv="PLF" weight="1.0"/>
         <initialWeight mv="REC1" lv="REC" weight="1.0"/>
         <initialWeight mv="REC2" lv="REC" weight="1.0"/>
         <initialWeight mv="REC3" lv="REC" weight="1.0"/>
         <initialWeight mv="REC4" lv="REC" weight="1.0"/>
      </initialWeights>
   </settings.algorithm.pls>
   <settings.algorithm.bootstrapping locked="false" innerModelDecoratorId="pathCoefficientAndPValue" outerModelDecoratorId="outerModelAndPValue" constructDecoratorId="CONSTRUCT_DECORATOR_R_SQUARE" pathWeighting="NONE" samples="5000" confidenceIntervalMethod="PERCENTILE_BCA" significanceLevel="0.05" testType="TWO_TAILED" parallelProcessing="true" bootstrappingComplexity="BASIC_BOOTSTRAPPING"/>
</ModelFileSettings>
